# Supplementary material for: Symmetric 4,6-dialkyl/arylamino-5-nitropyrimidines: theoretical explanation of why aminolysis of alkoxy groups is favoured over chlorine aminolysis in nitro-activated pyrimidines
Source: Royal Society of Chemistry journal article supplement (doi:10.1039/d3nj03495j), 2023-01-01
Supplement: d3nj03495j1.pdf [file d3nj03495j1.pdf]

## Supporting Information

**Symmetric 4,6-Dialkylamine-5-Nitro/Aminopyrimidines: Theoretical Explanation of Why Aminolysis of Alkoxy Groups Is Favoured over That of Chlorine in Nitro-Activated Pyrimidines.**

**Authors:** Laura Córdoba Gómez, Alvaro Lorente-Macias, María José Pineda de las Infantas y Villatoro, Andrés Garzón-Ruiz\* and Juan J. Diaz-Mochon\*

## 1. DFT calculations

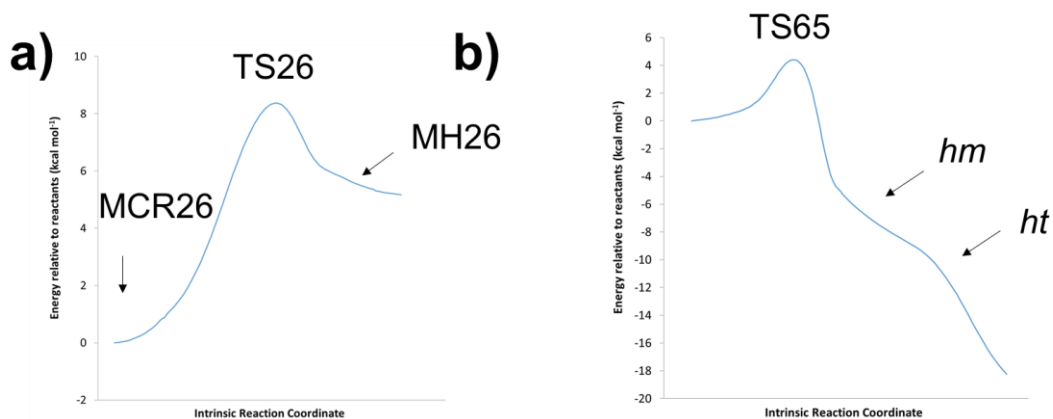

**Figure S1.** Computed IRC profiles for reactions from **2** to **6** (a) and **6** to **5** (b). Calculations were performed at the M06-2X/6-31G\* level of theory including solvation effects (dichloromethane).

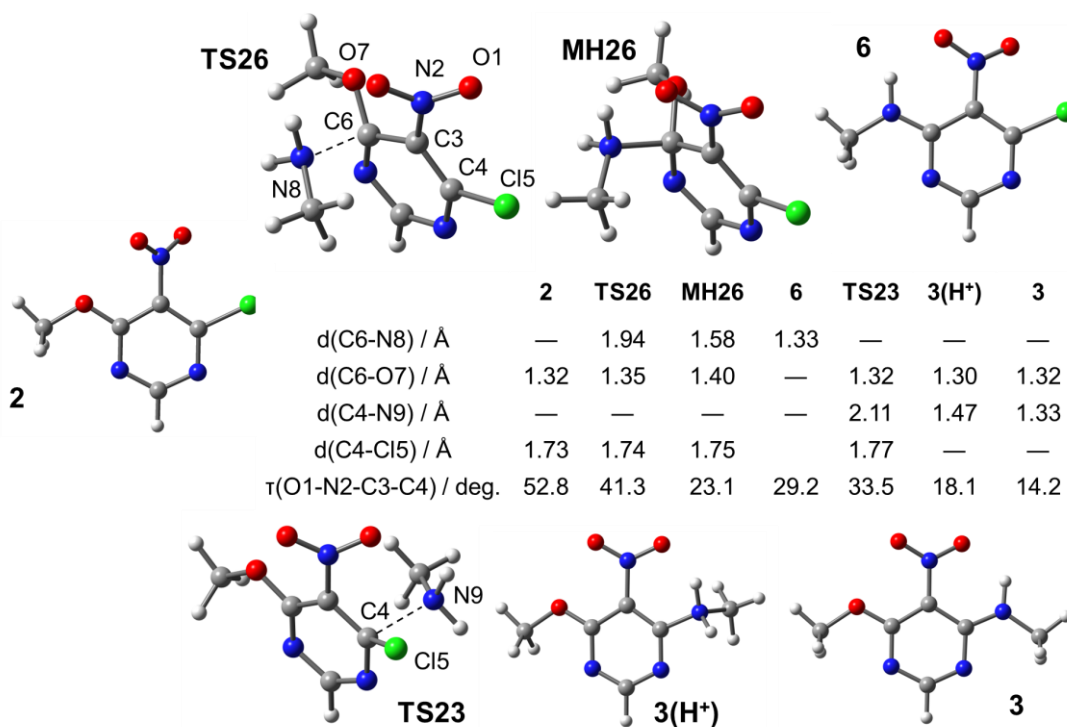

**Figure S2.** Molecular structure calculated for different species involved in reaction pathways 1 and 2 shown in reaction Scheme 3a. Calculations were performed at the M06-2X/6-31G\* level of theory including solvation effects (dichloromethane).

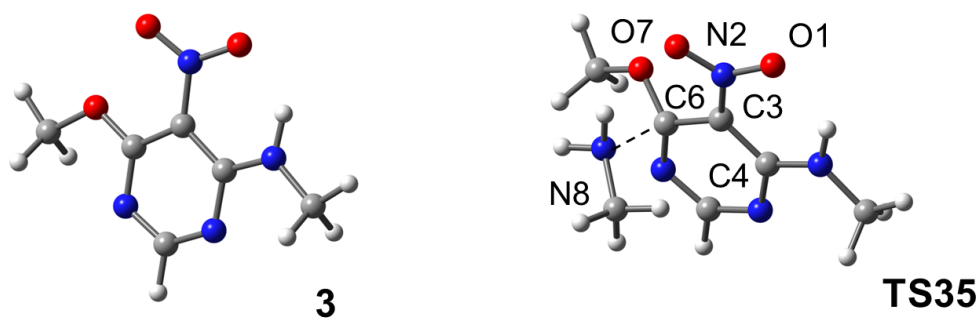

|                                          | <b>3</b> | <b>TS35</b> | <b>MH35</b> | <b>5</b> |
|------------------------------------------|----------|-------------|-------------|----------|
| $d(\text{C6-N8}) / \text{\AA}$           | —        | 1.94        | 1.57        | 1.33     |
| $d(\text{C6-O7}) / \text{\AA}$           | 1.32     | 1.35        | 1.40        | —        |
| $\tau(\text{O1-N2-C3-C4}) / \text{deg.}$ | 14.1     | 15.7        | 2.57        | 0.00     |

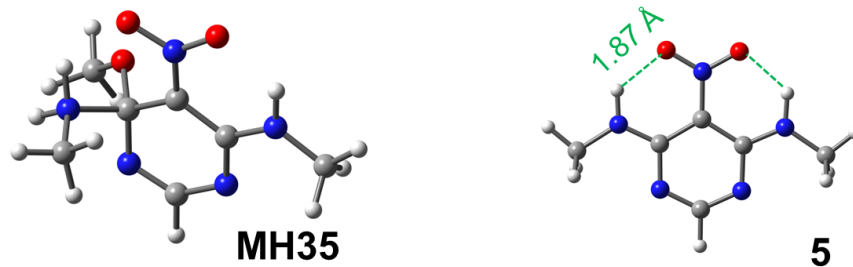

**Figure S3.** Molecular structure calculated for different species involved in reaction pathway 3 shown in reaction Scheme 3b. Calculations were performed at the M06-2X/6-31G\* level of theory including solvation effects (dichloromethane).

## 2. Synthesis

- 4-chloro-5-nitro-6-(prop-2-ynoxy)pyrimidine (2a):

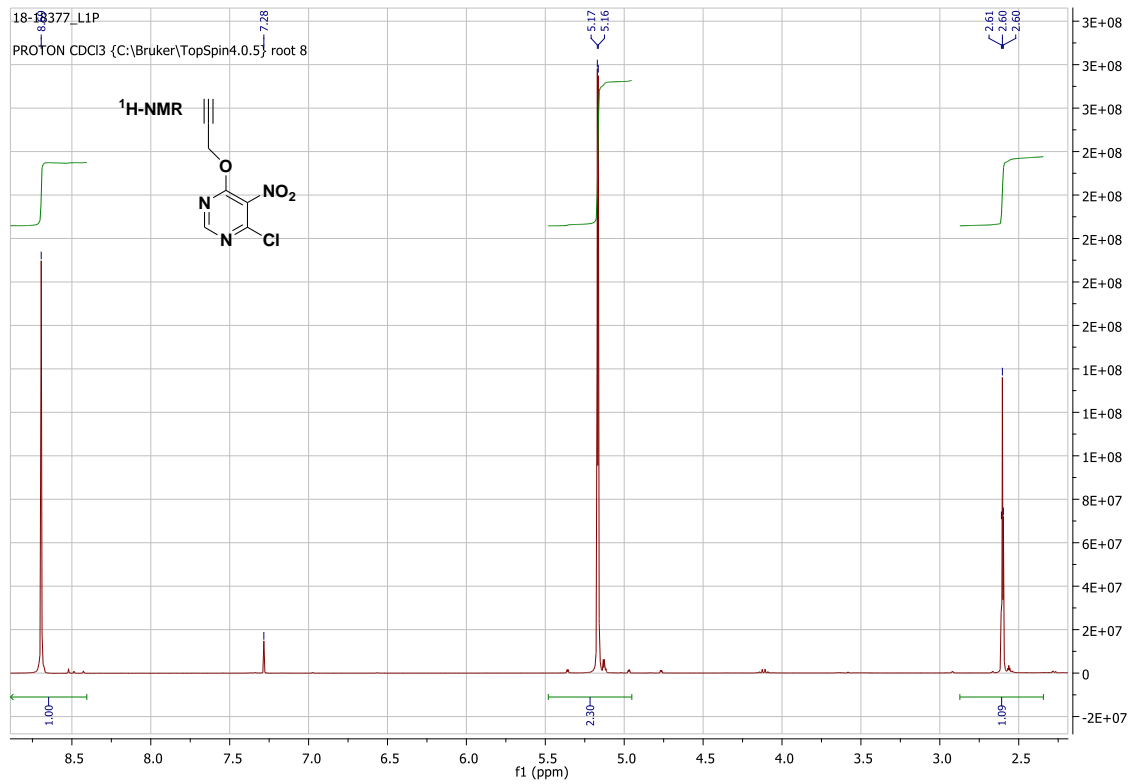

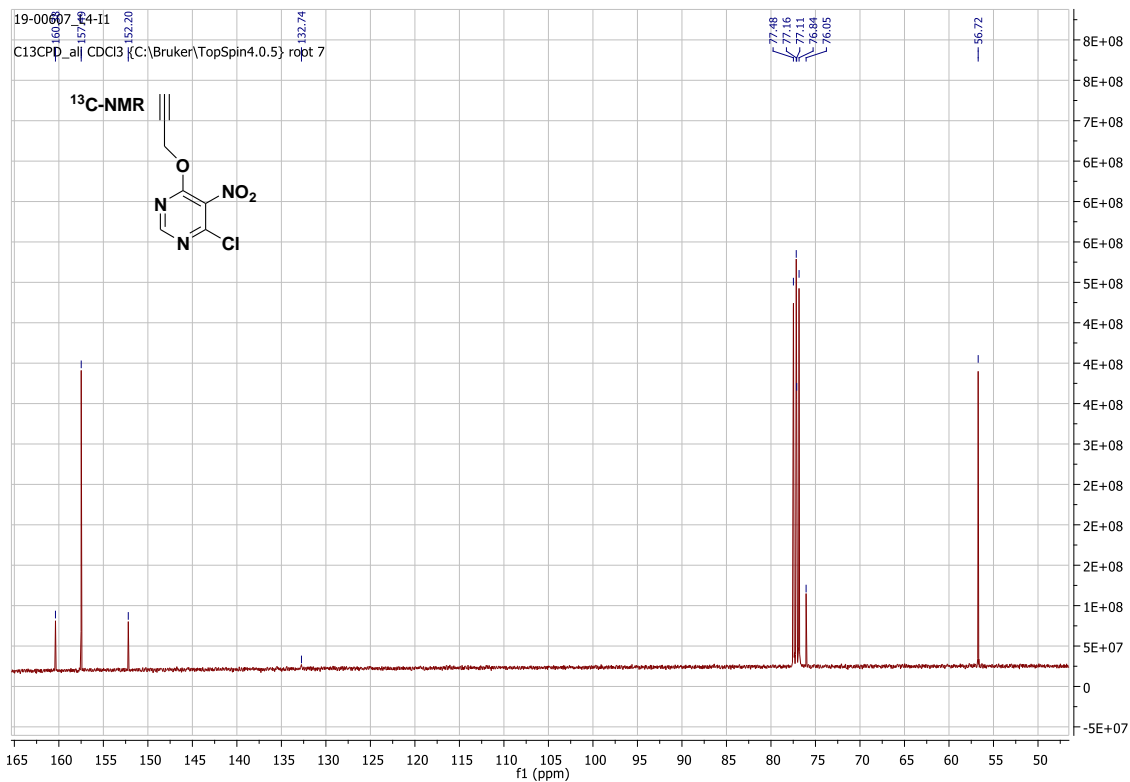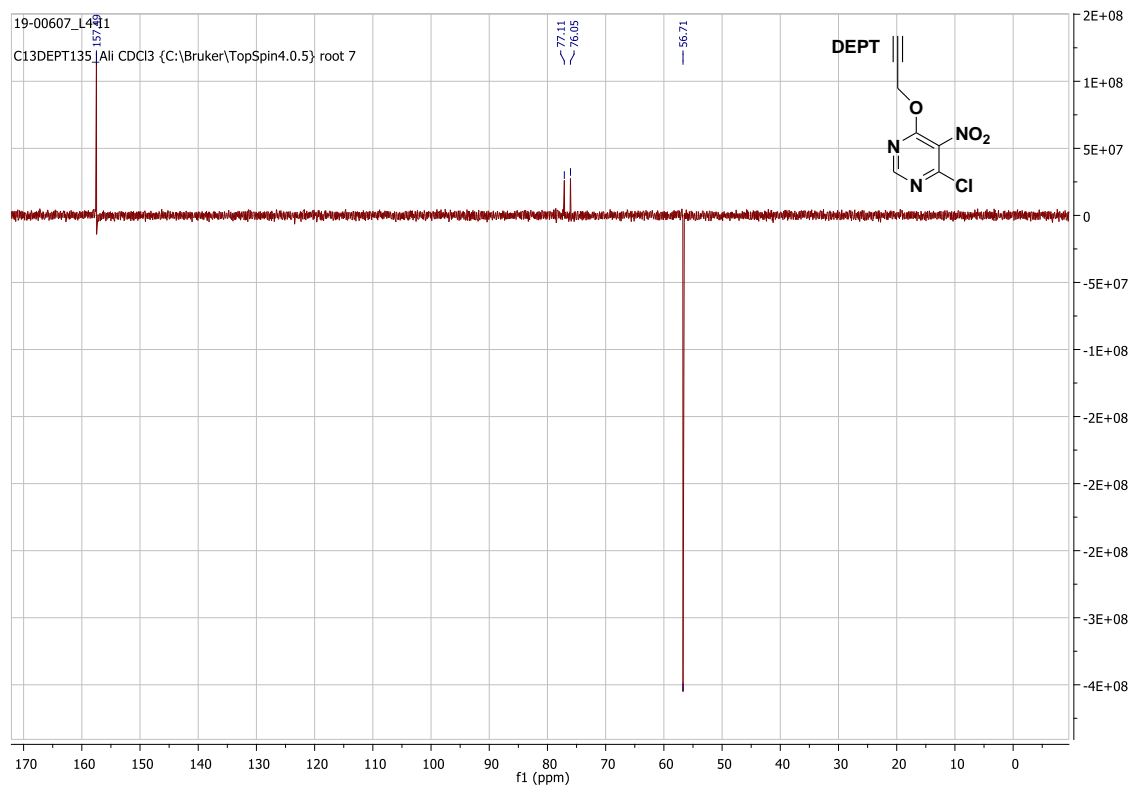

- **4-benzyloxy-6-chloro-5-nitropyrimidine (2b):**

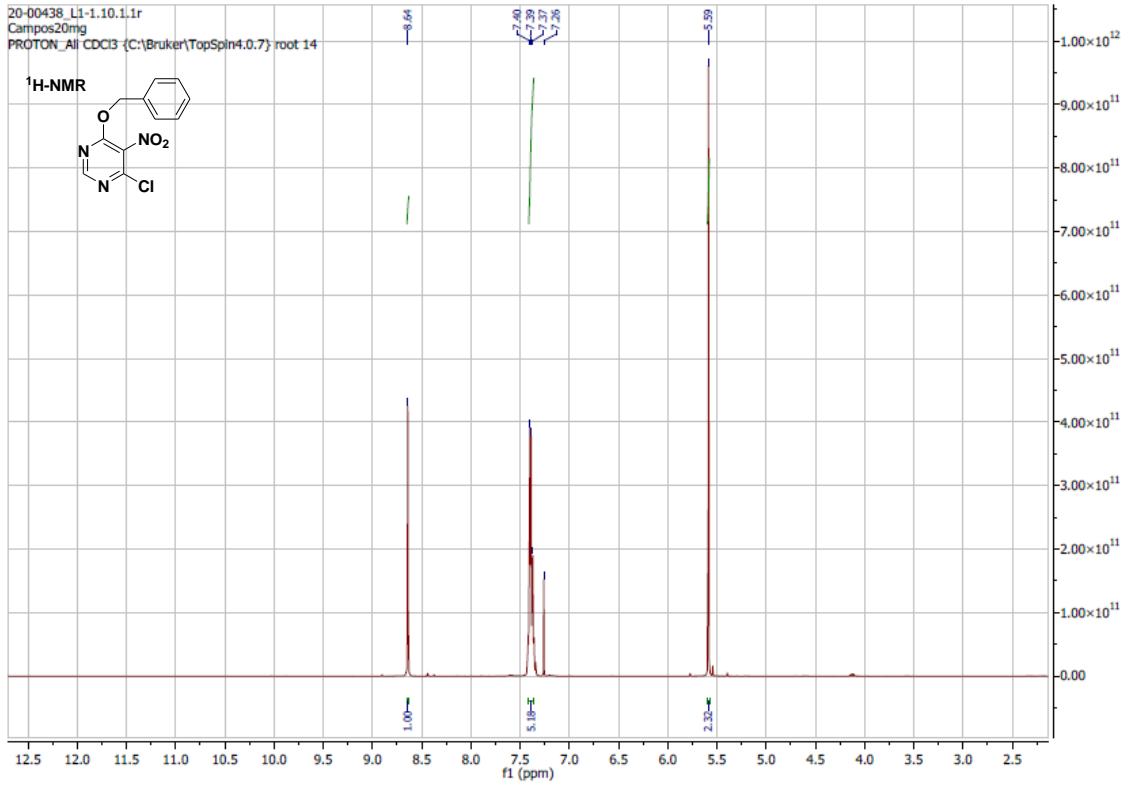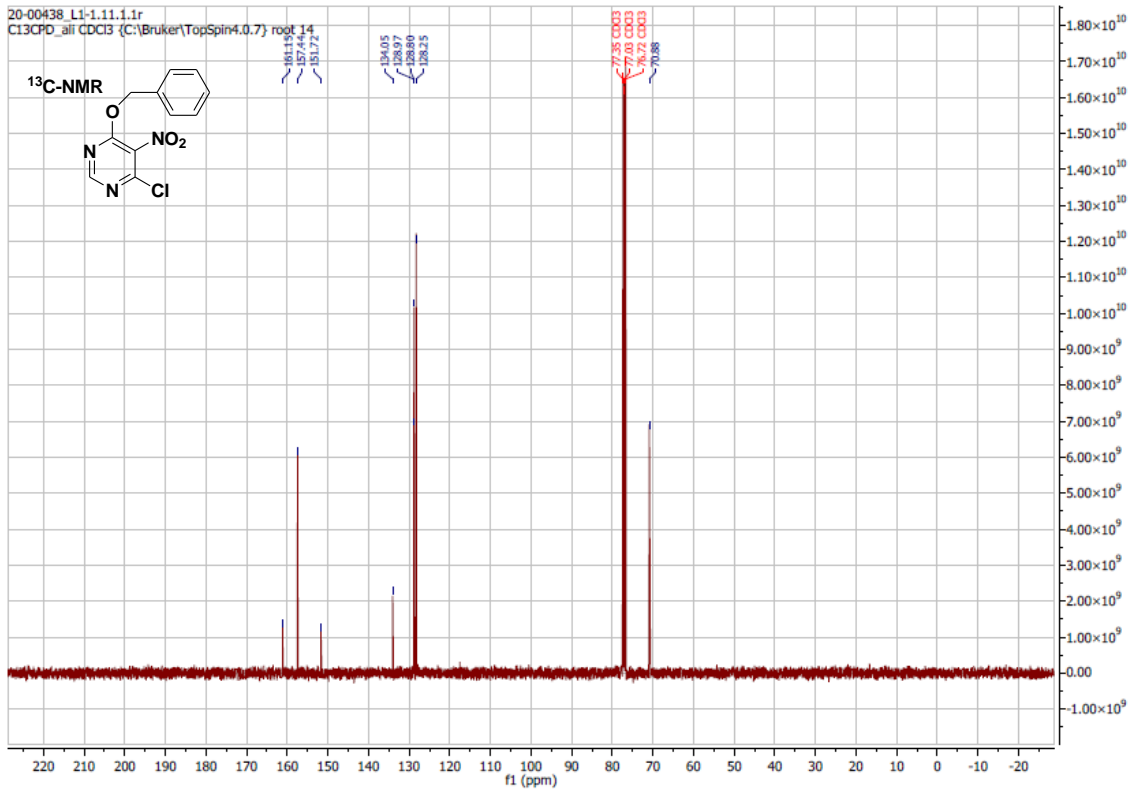

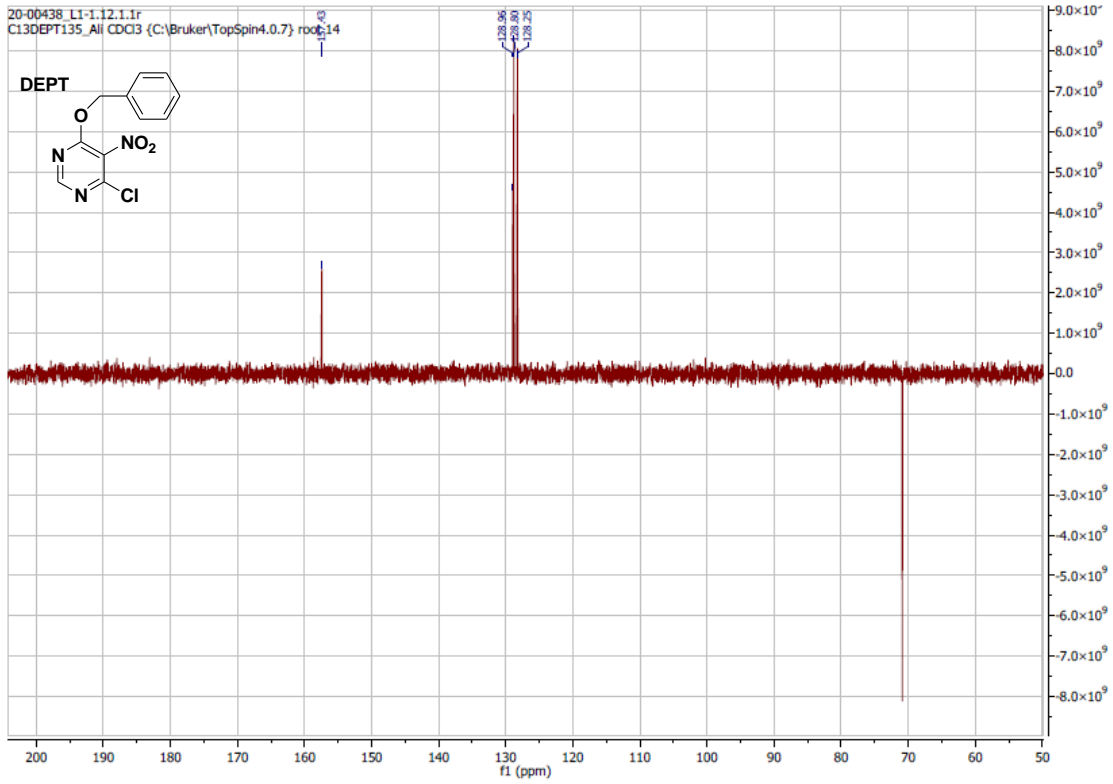

- 4- chloro-6-ethoxy-5-nitropyrimidine (2c):

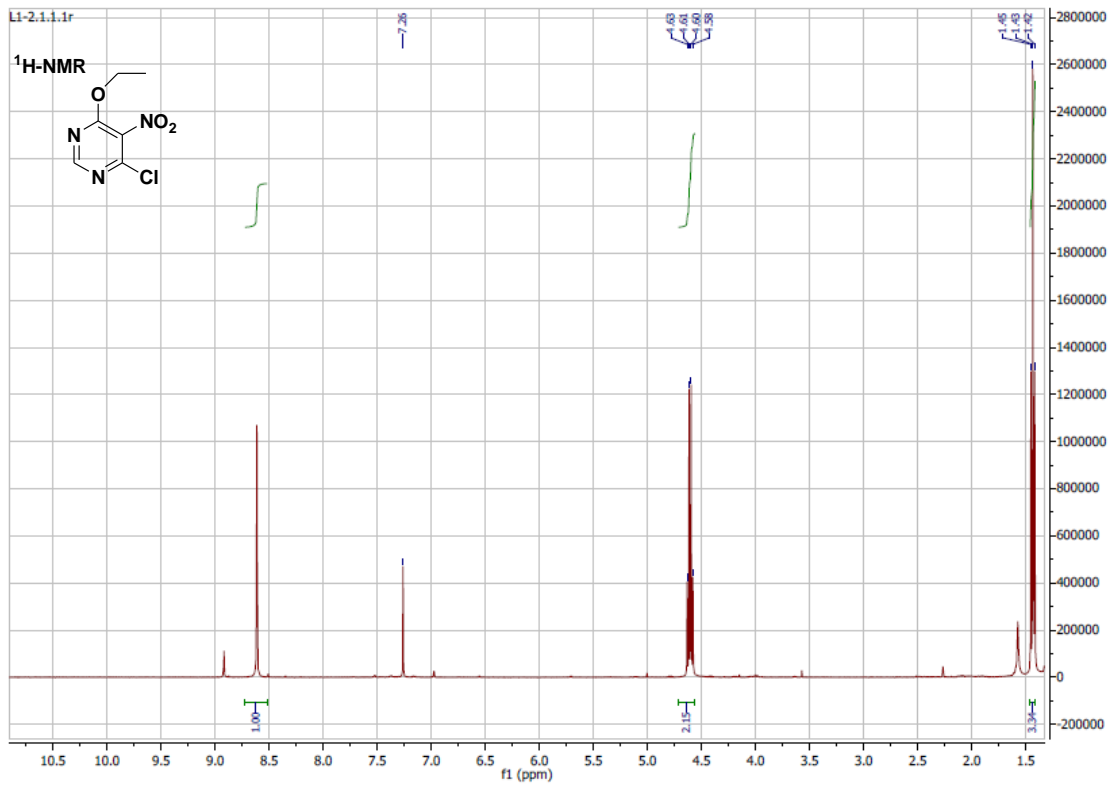

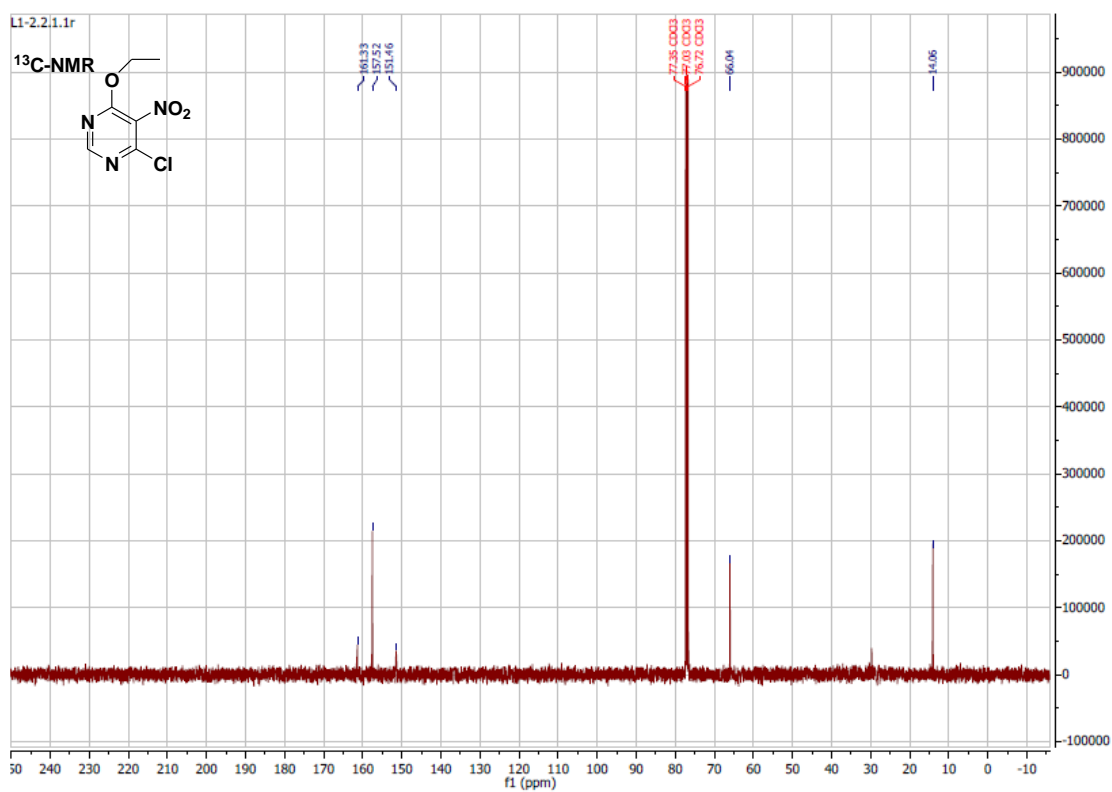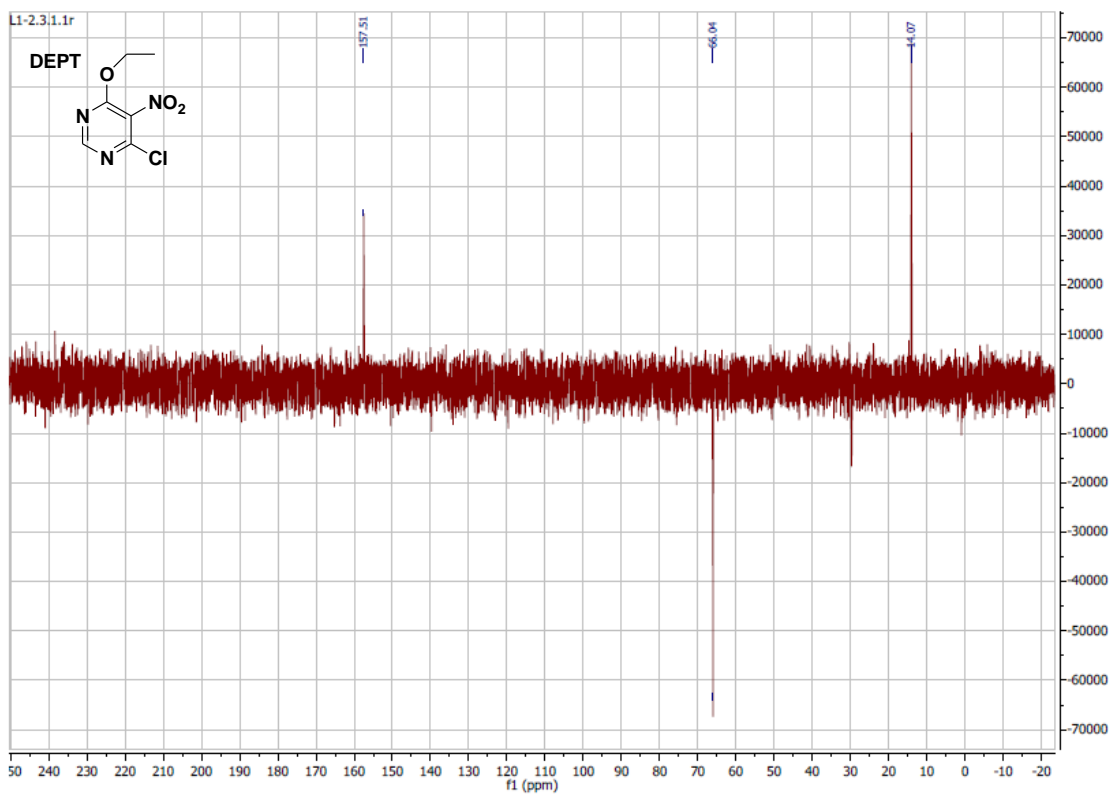

- **N<sup>4</sup>,N<sup>6</sup>-dibenzyl-5-nitropyrimidine-4,6-diamine (5a):**



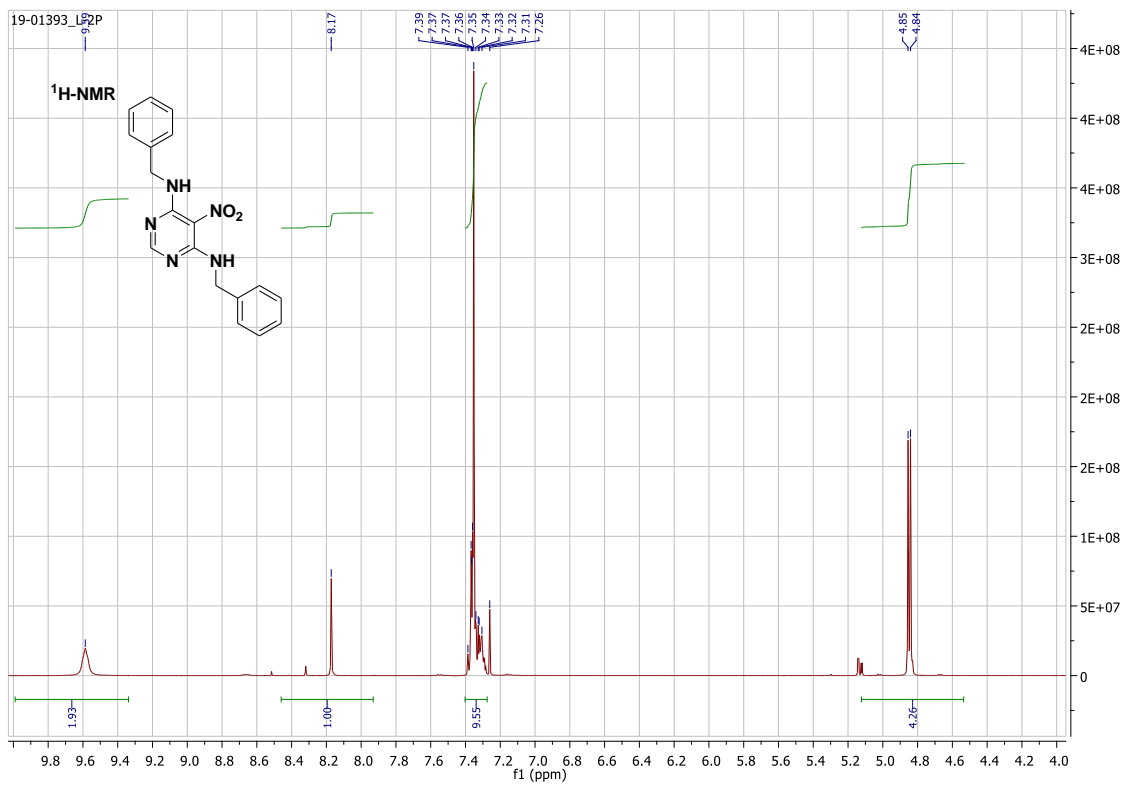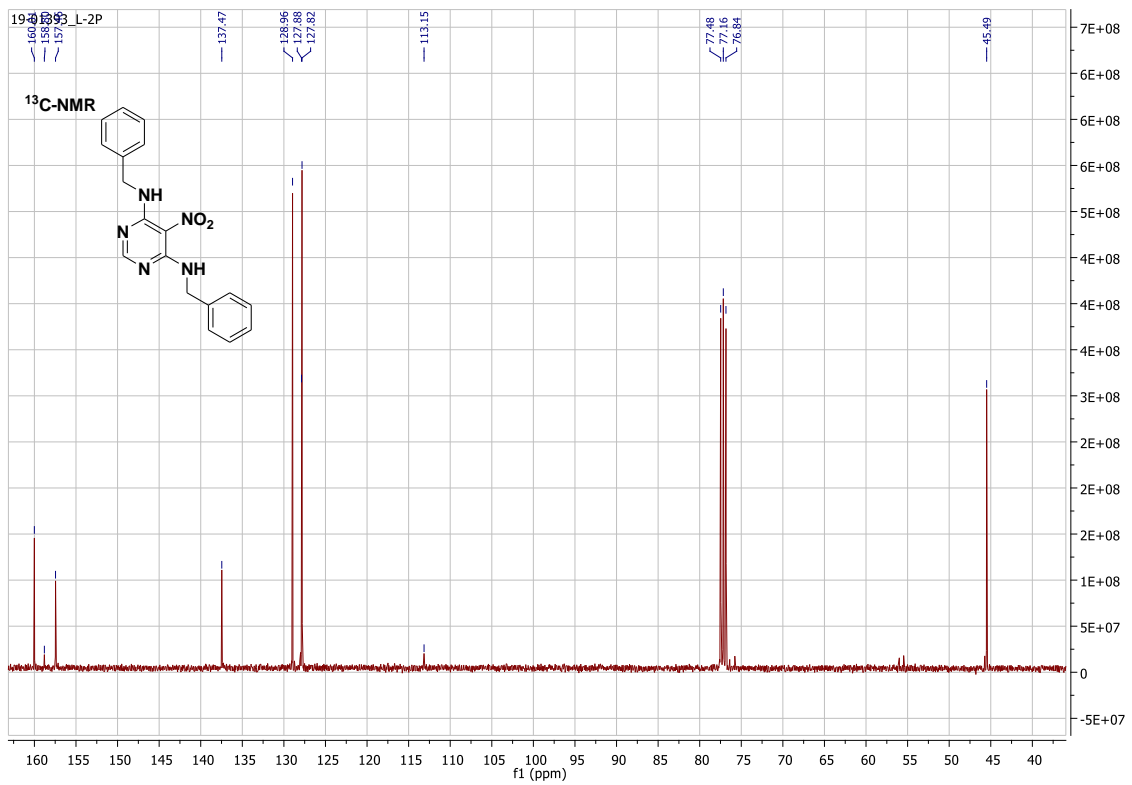

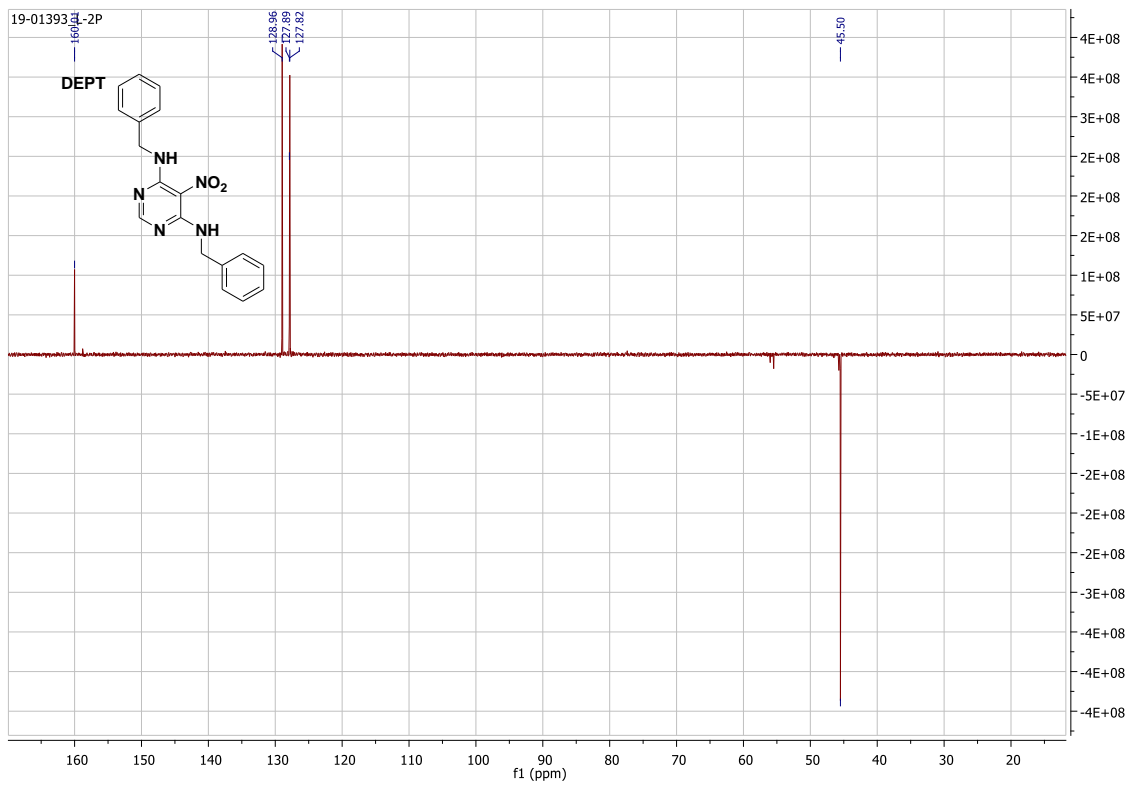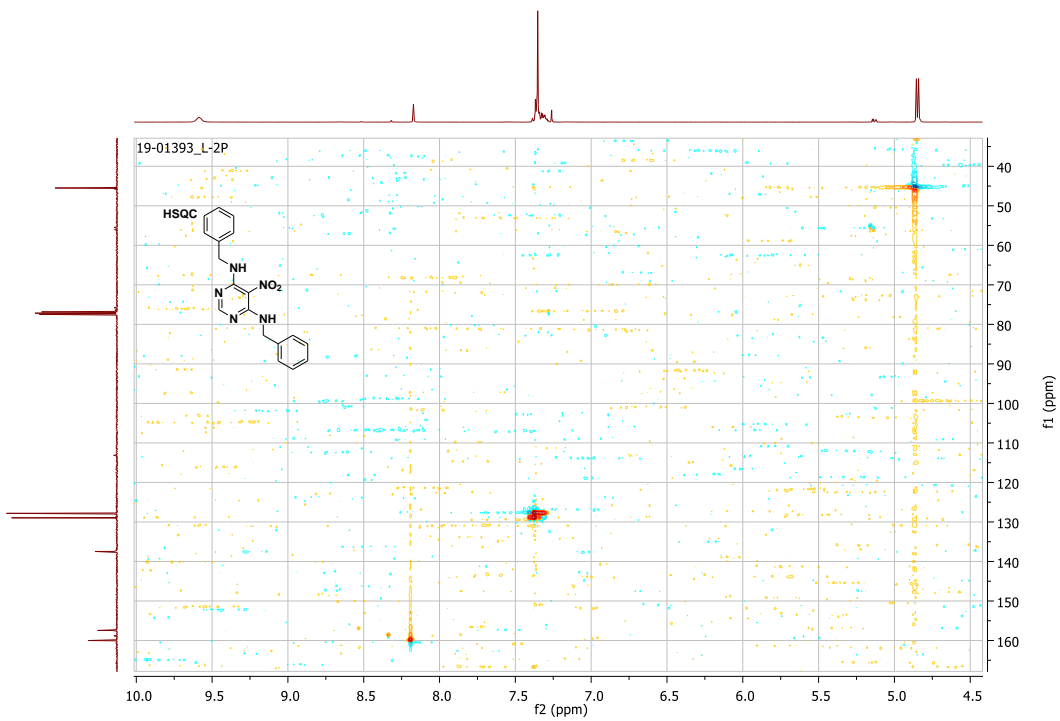

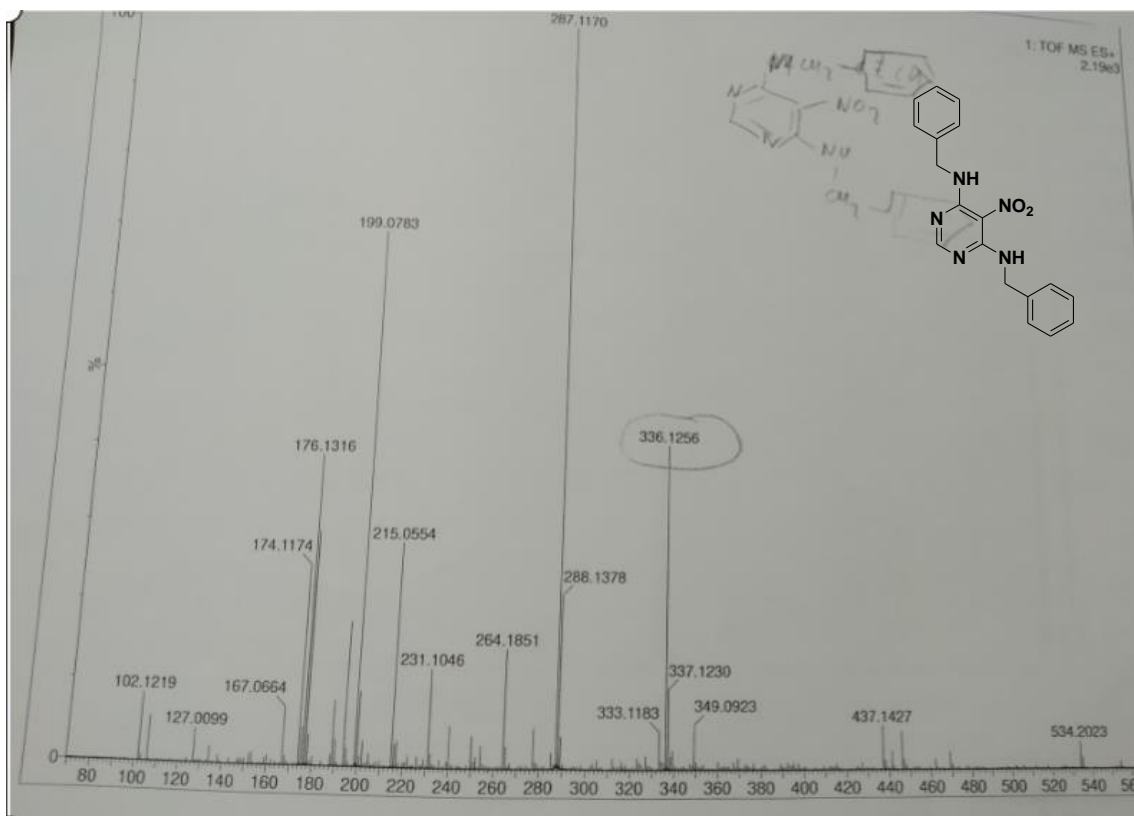

## Elemental Composition Report

### Single Mass Analysis

Tolerance = 10.0 PPM / DBE: min = -1.5, max = 50.0

Element prediction: Off

Number of isotope peaks used for i-FIT = 3

Monoisotopic Mass, Even Electron Ions

175 formula(e) evaluated with 2 results within limits (up to 50 closest results for each mass)

Elements Used:

C: 0-19 H: 0-1000 N: 0-6 O: 0-4 Na: 0-1

13-02MariaJose 66 (1.428) AM (Top, 1, Ht, 5000.0, 0.00, 1.00)

1: TOF MS ES+

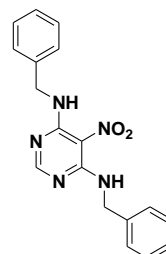

Page 1

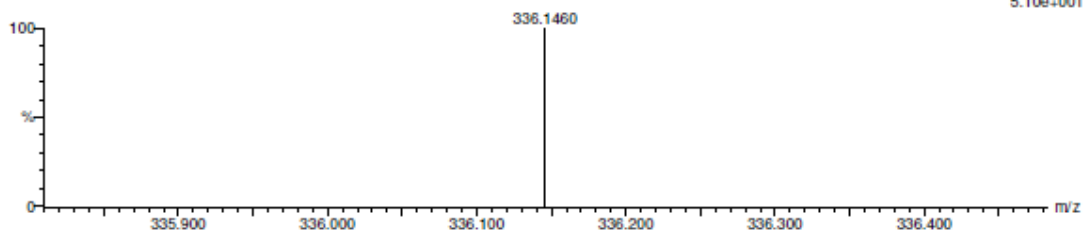

5.10e+001

Minimum: -1.5  
Maximum: 5.0 10.0 50.0

| Mass     | Calc. Mass | mDa  | PPM  | DBE  | i-FIT | i-FIT (Norm) | Formula          |
|----------|------------|------|------|------|-------|--------------|------------------|
| 336.1460 | 336.1461   | -0.1 | -0.3 | 12.5 | 16.7  | 0.7          | C18 H18 N5 O2    |
|          | 336.1436   | 2.4  | 7.1  | 9.5  | 16.6  | 0.6          | C16 H19 N5 O2 Na |

- 5-nitro-N<sup>4</sup>,N<sup>6</sup>- diphenethylpyrimidine-4,6-diamine (5b):

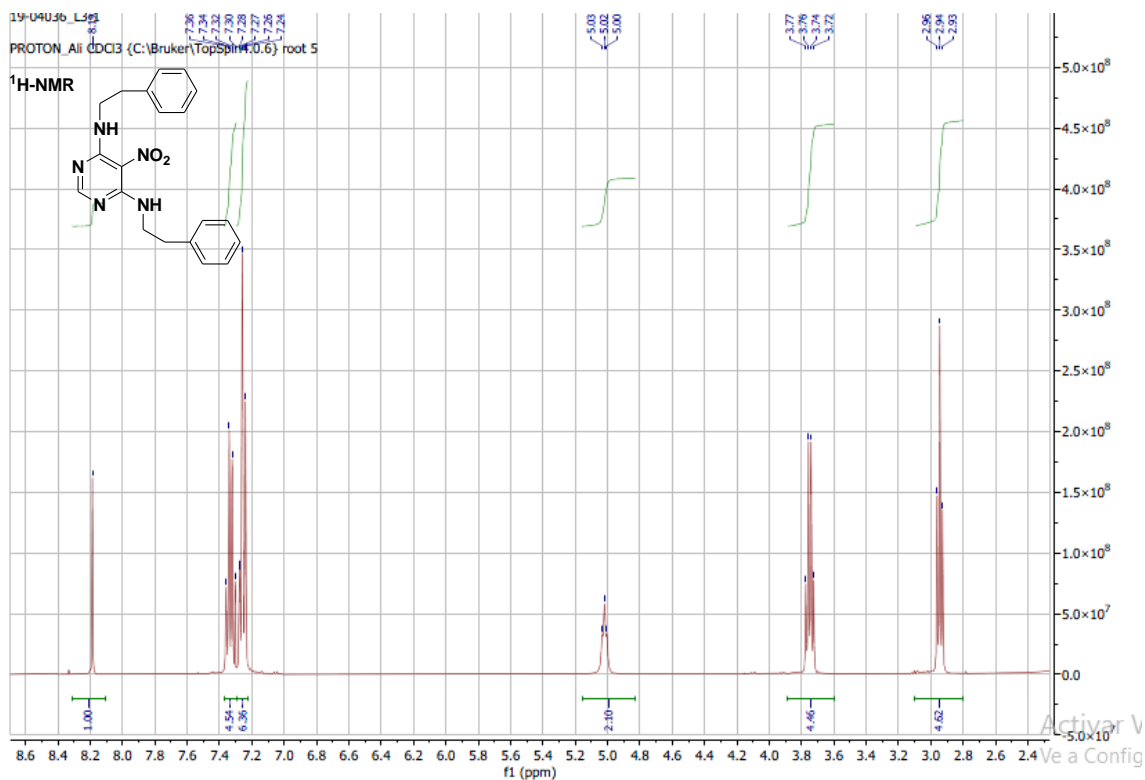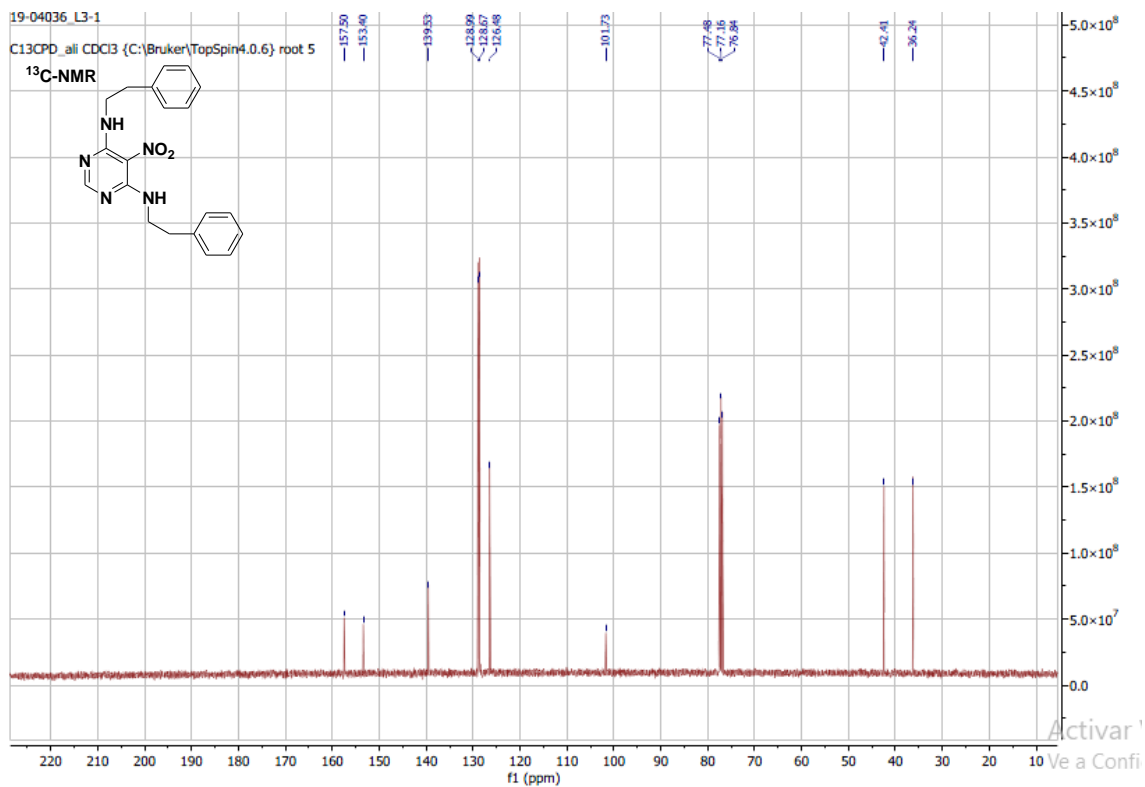

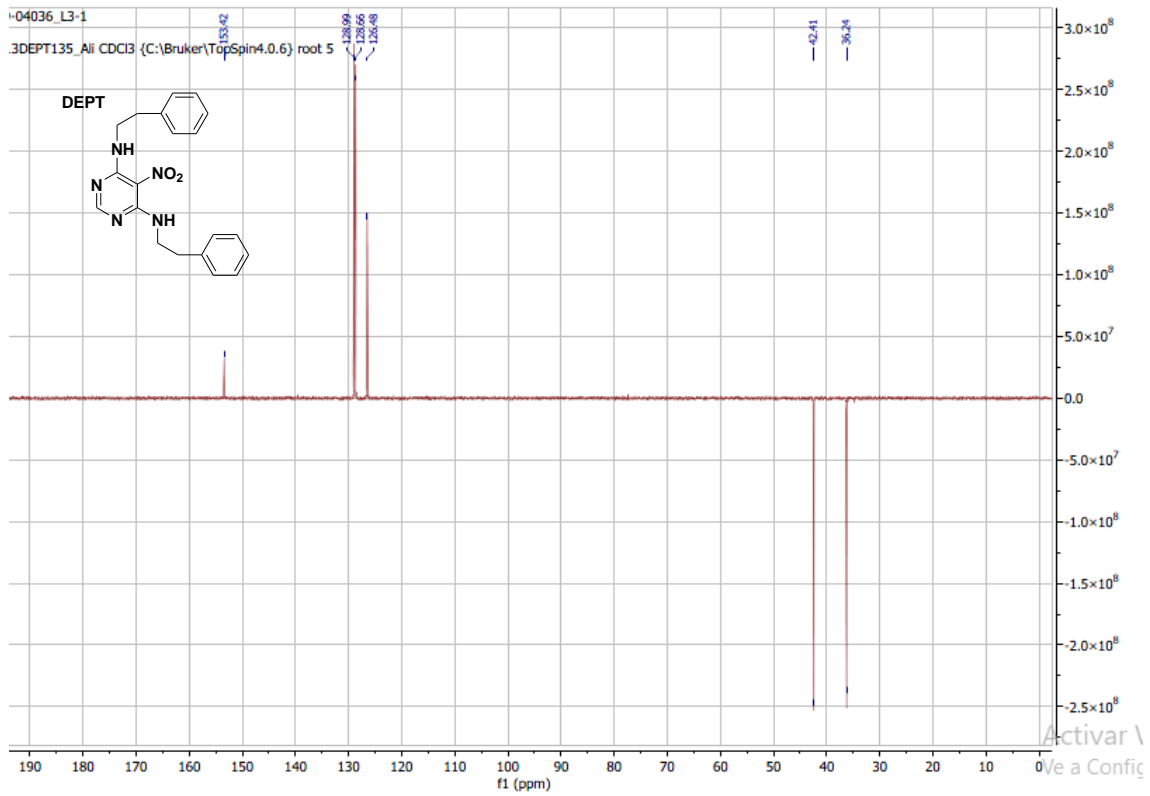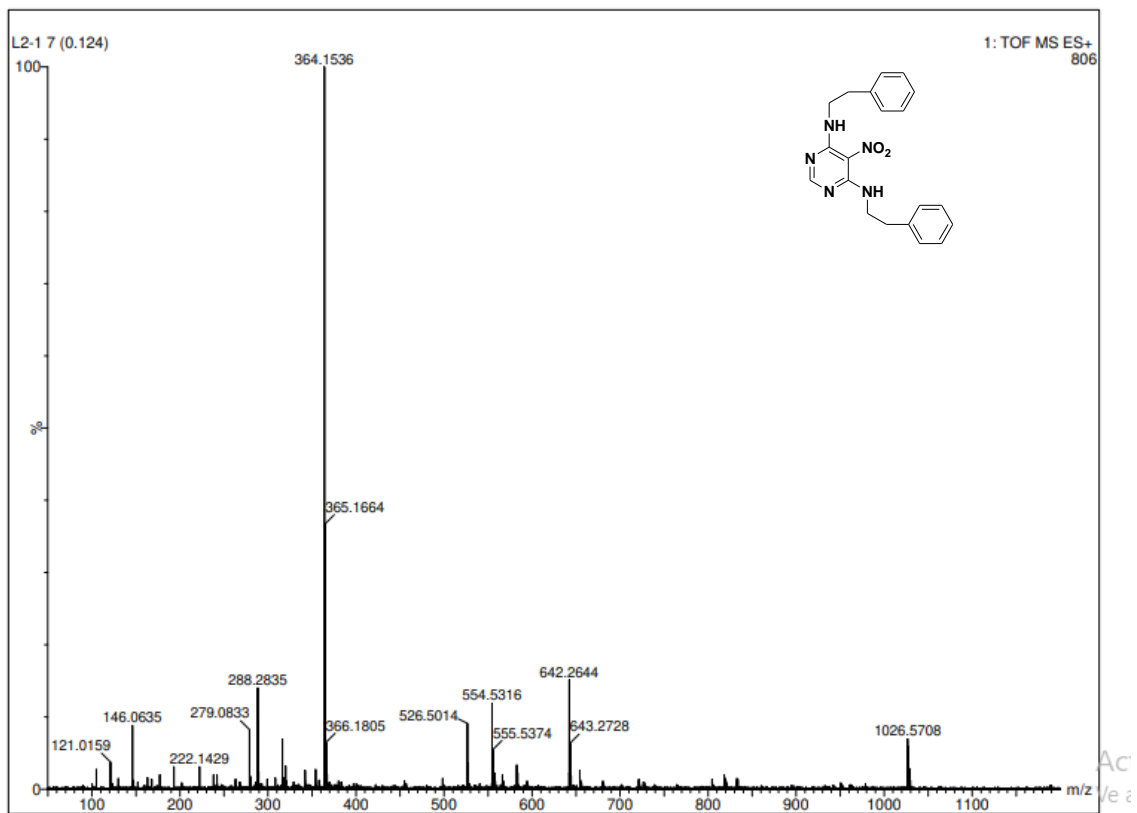

### Elemental Composition Report

#### Single Mass Analysis

Tolerance = 10.0 PPM / DBE: min = -1.5, max = 50.0

Element prediction: Off

Number of isotope peaks used for i-FIT = 3

Monoisotopic Mass, Even Electron Ions

294 formula(e) evaluated with 2 results within limits (up to 50 closest results for each mass)

Elements Used:

C: 0-20 H: 0-1000 N: 0-8 O: 0-5 Na: 0-1

L2-1-27 (0.141)AM (Top,1, H1,5000.0,0.00,1.00)

1: TOF MS ES+

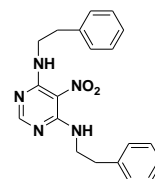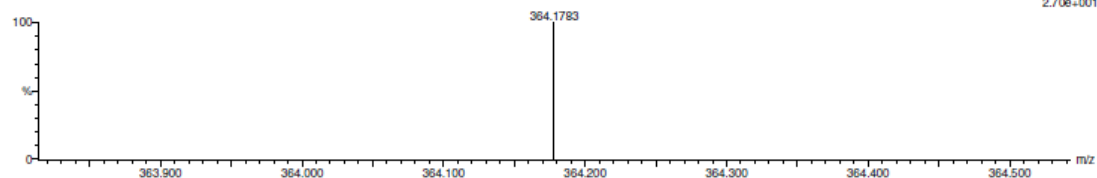

| Mass     | Calc. Mass | mDa | PPM | DBE  | 1-FIT | 1-FIT (Norm) | Formula          |
|----------|------------|-----|-----|------|-------|--------------|------------------|
| 364.1783 | 364.1774   | 0.9 | 2.5 | 12.5 | 14.7  | 0.7          | C20 H22 N5 O2    |
|          | 364.1749   | 3.4 | 9.3 | 9.5  | 14.7  | 0.7          | C18 H23 N5 O2 Na |

- **N<sup>4</sup>,N<sup>6</sup>-bis (4-methoxybenzyl)-5-nitropyrimidine-4,6-diamine (5c):**

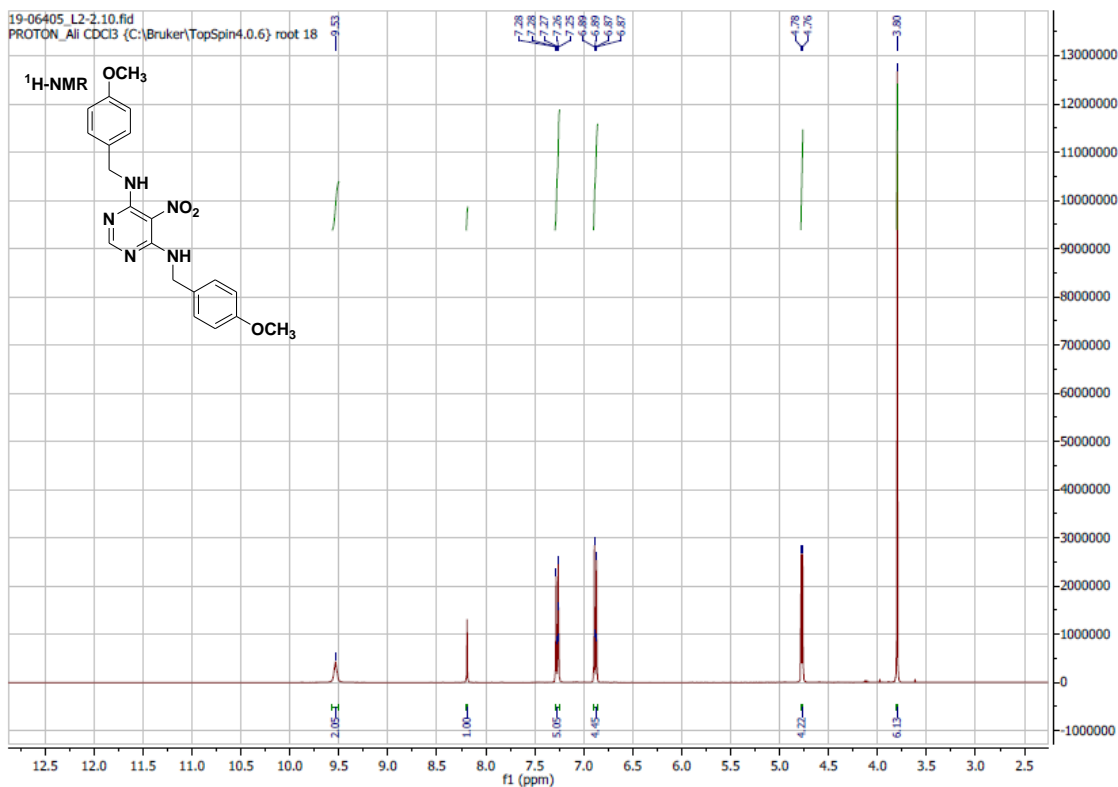

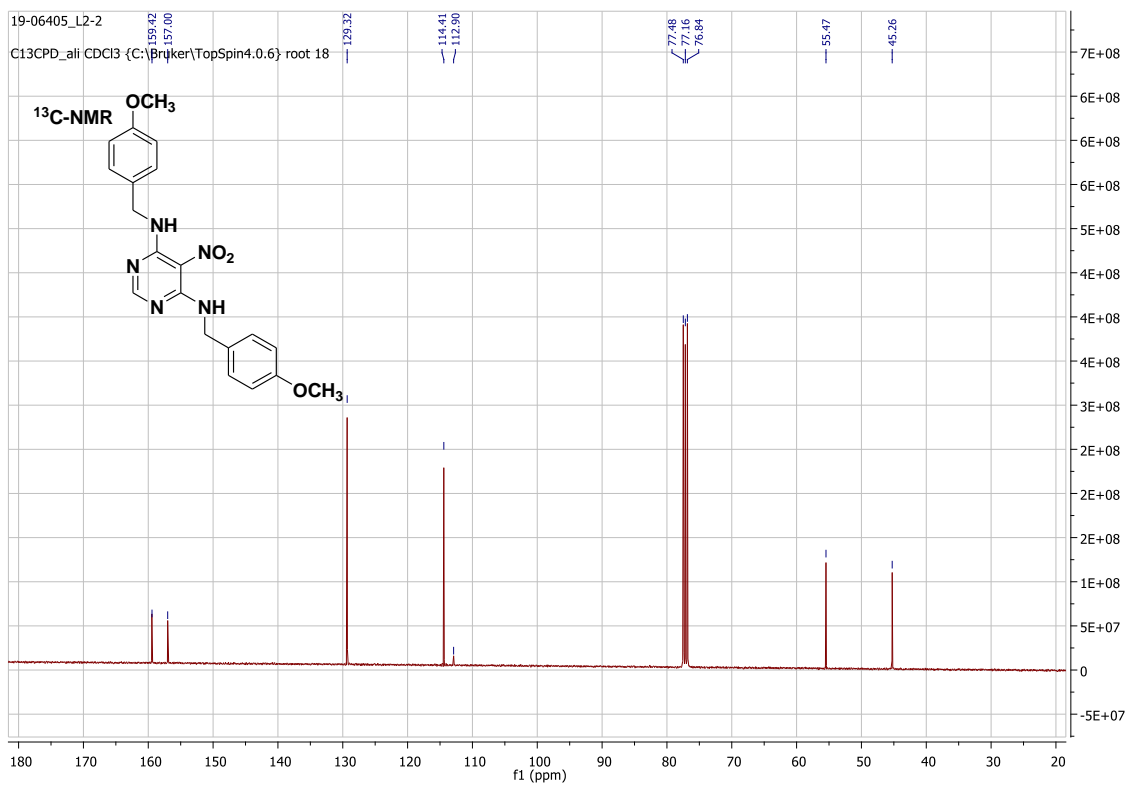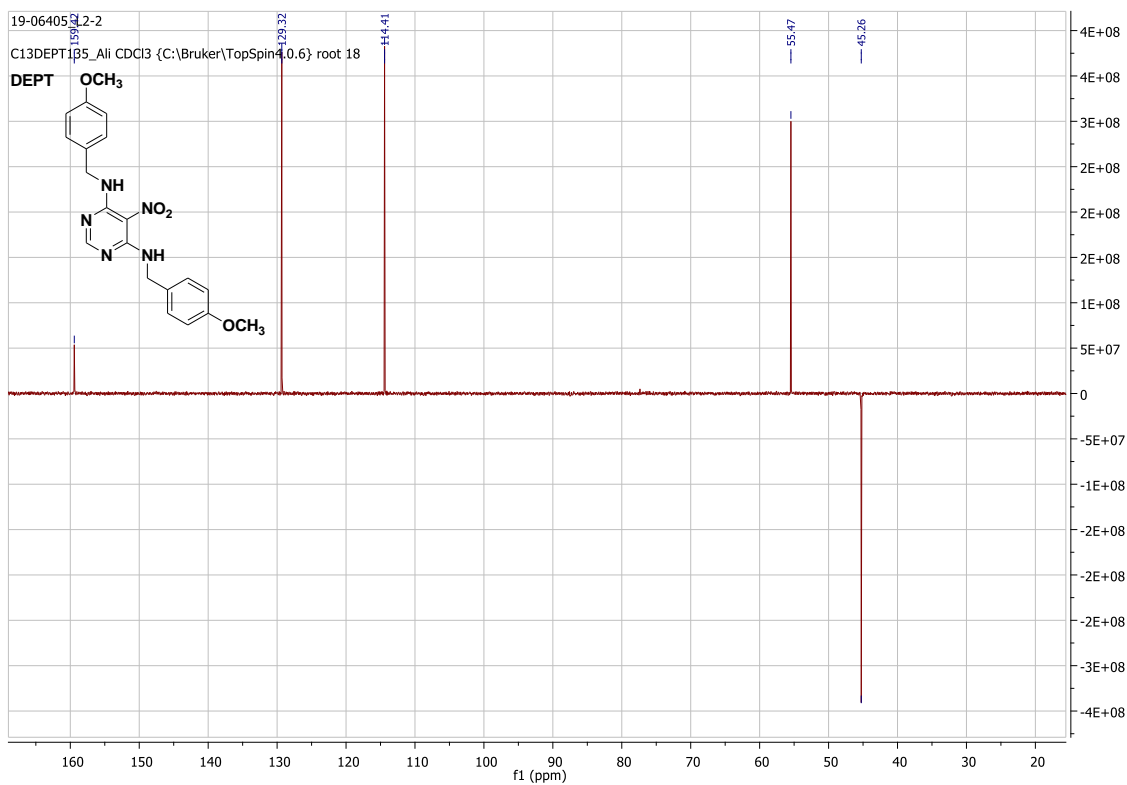

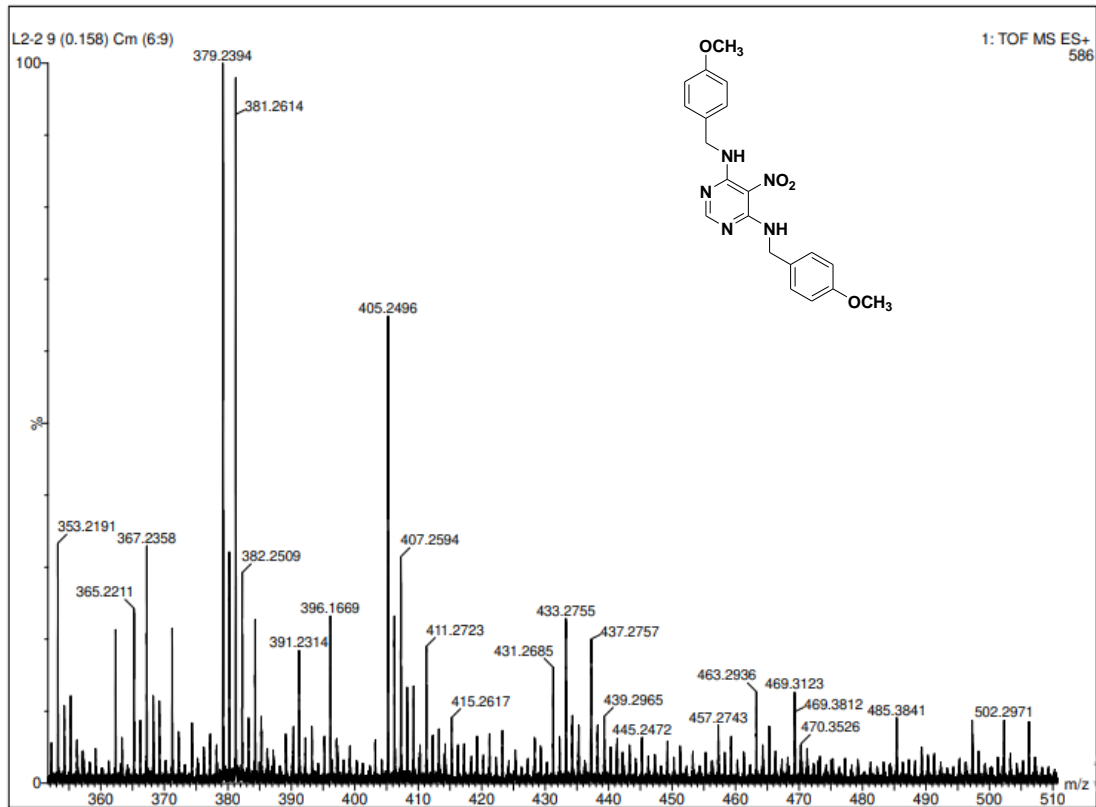

### Elemental Composition Report

Page 1

#### Single Mass Analysis

Tolerance = 10.0 PPM / DBE: min = -1.5, max = 50.0

Element prediction: Off

Number of isotope peaks used for i-FIT = 3

#### Monoisotopic Mass, Even Electron Ions

76 formula(e) evaluated with 2 results within limits (up to 50 closest results for each mass)

Elements Used:

C: 0-20 H: 0-1000 N: 0-5 O: 0-4 Na: 0-1

L2-2 9 (0.158) AM (Top, 6, Ht, 5000, 0.0, 0.0, 1.00); Cm (6.9)

1: TOF MS ES+

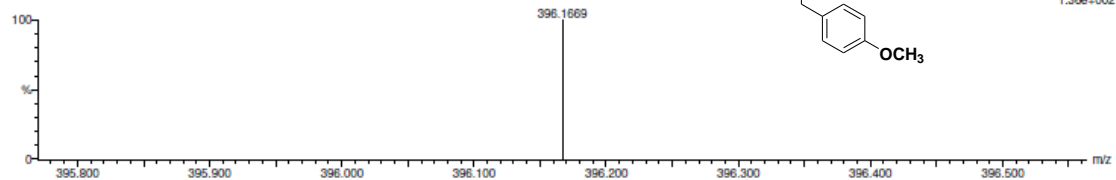

Minimum: 5.0 10.0 -1.5  
Maximum: 396.1672 396.1648 2.1 5.3 9.5

| Mass     | Calc. Mass | mDa  | PPM  | DBE  | 1-FIT | 1-FIT (Norm) | Formula          |
|----------|------------|------|------|------|-------|--------------|------------------|
| 396.1669 | 396.1672   | -0.3 | -0.8 | 12.5 | 19.2  | 0.6          | C20 H22 N5 O4    |
|          | 396.1648   | 2.1  | 5.3  | 9.5  | 19.4  | 0.8          | C18 H23 N5 O4 Na |

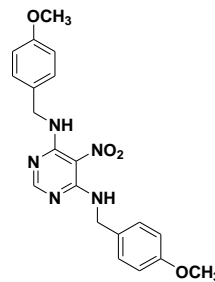



- **N<sup>4</sup>,N<sup>6</sup>-diisopropyl-5-nitropyrimidine-4,6-diamine (5d):**

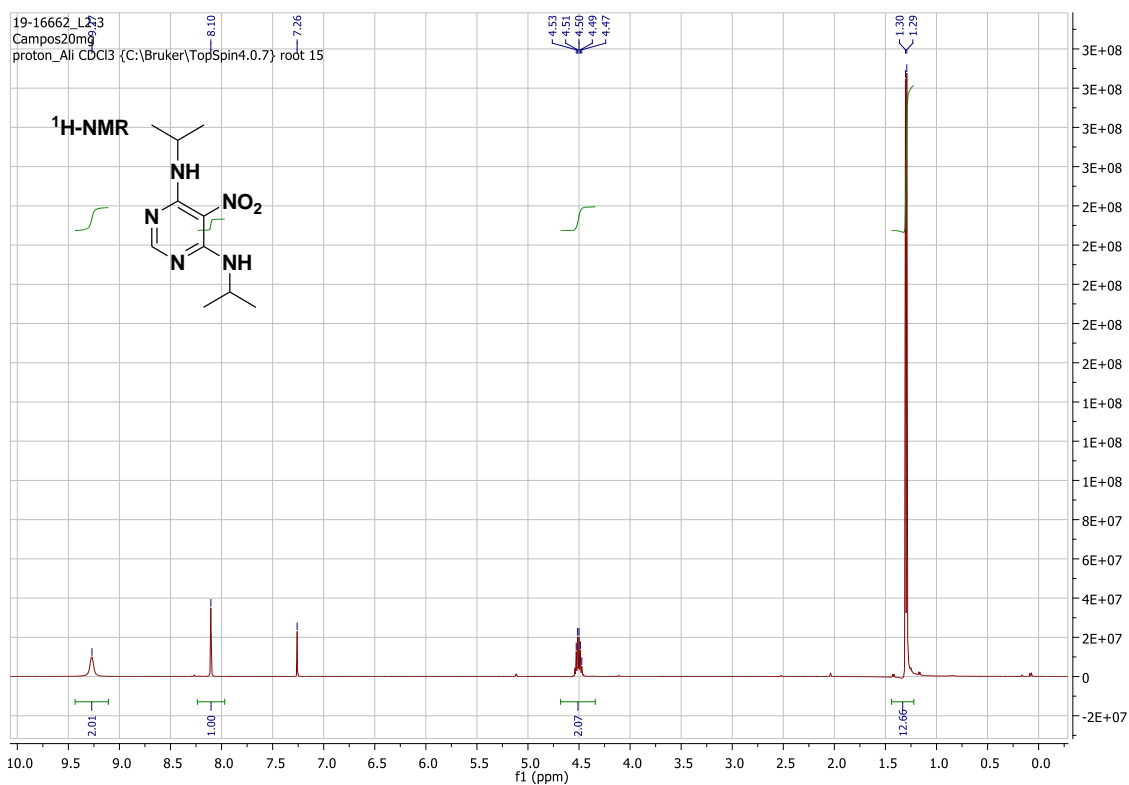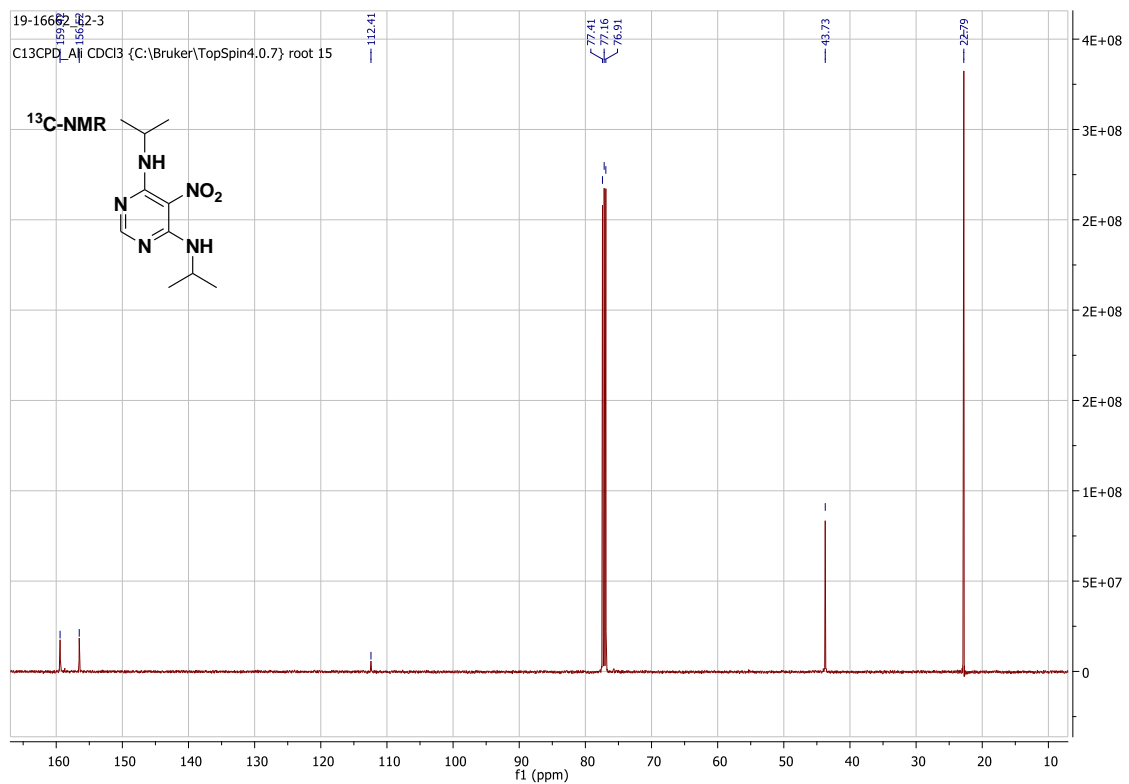

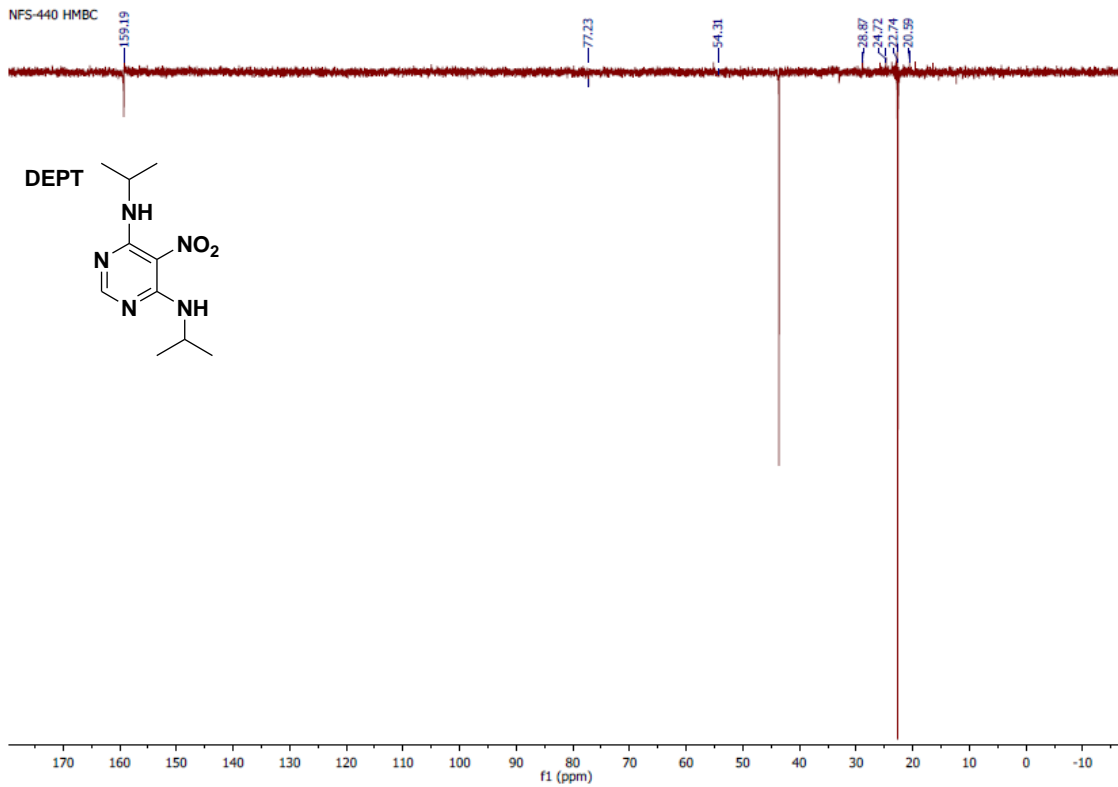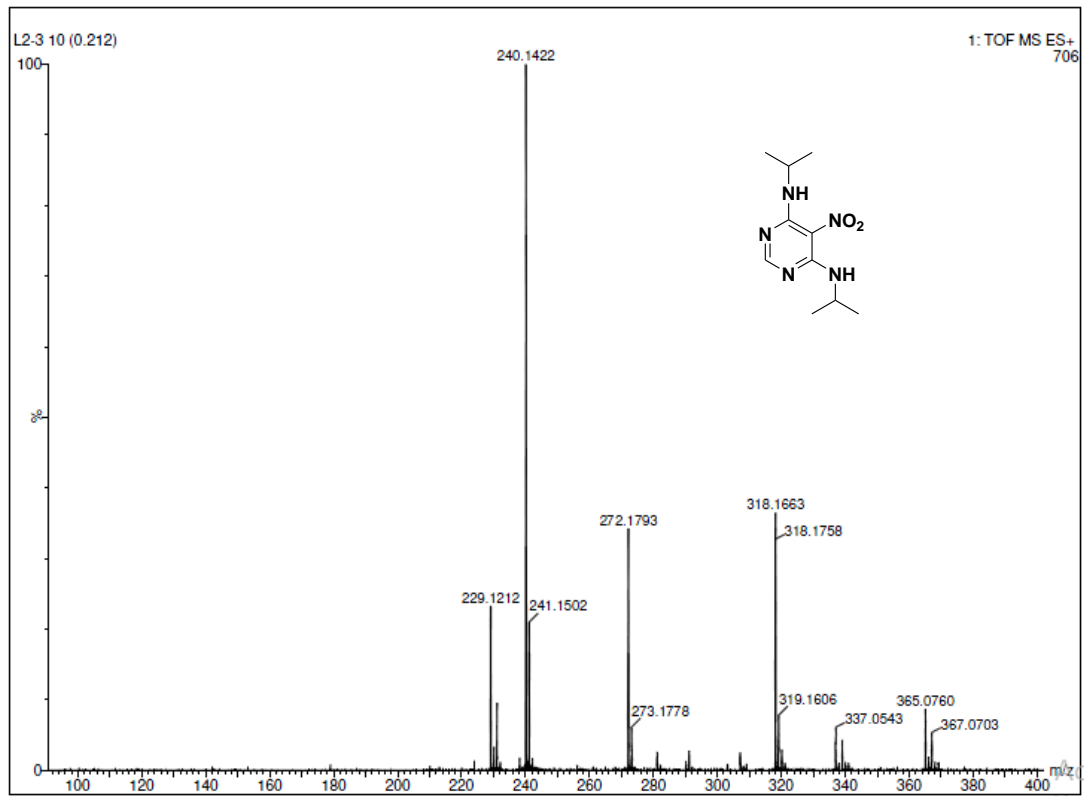

## Elemental Composition Report

### Single Mass Analysis

Tolerance = 10.0 PPM / DBE: min = -1.5, max = 50.0

Element prediction: Off

Number of isotope peaks used for i-FIT = 3

Monoisotopic Mass, Even Electron Ions  
259 formula(e) evaluated with 2 results within limits (up to 50 closest results for each mass)

Elements Used:

C: 0-31 H: 0-1000 N: 0-8 O: 0-20

L2-3 10 (0.212) AM (Cen,6, 5.00, HL5000.0,0.00,1.00)

1: TOF MS ES+

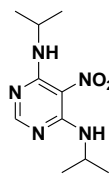

Page 1

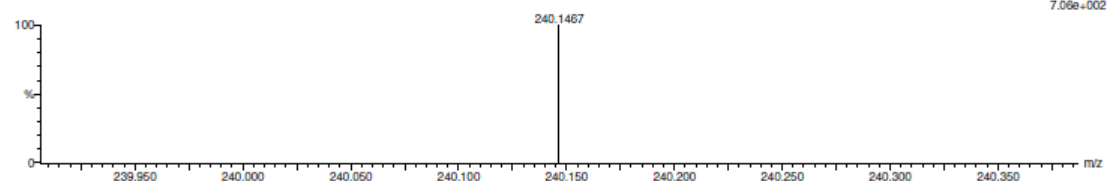

| Mass     | Calc. Mass | mDa | PPM | DBE  | 1-FIT | 1-FIT (Norm) | Formula       |
|----------|------------|-----|-----|------|-------|--------------|---------------|
| 240.1467 | 240.1461   | 0.6 | 2.5 | 4.5  | 22.2  | 0.3          | C10 H18 N5 O2 |
|          | 240.1447   | 2.0 | 8.3 | -0.5 | 23.2  | 1.2          | C9 H22 N O6   |

- **N<sup>4</sup>,N<sup>6</sup>-di-tert-butyl-5-nitropyrimidine-4,6-diamine (5e):**

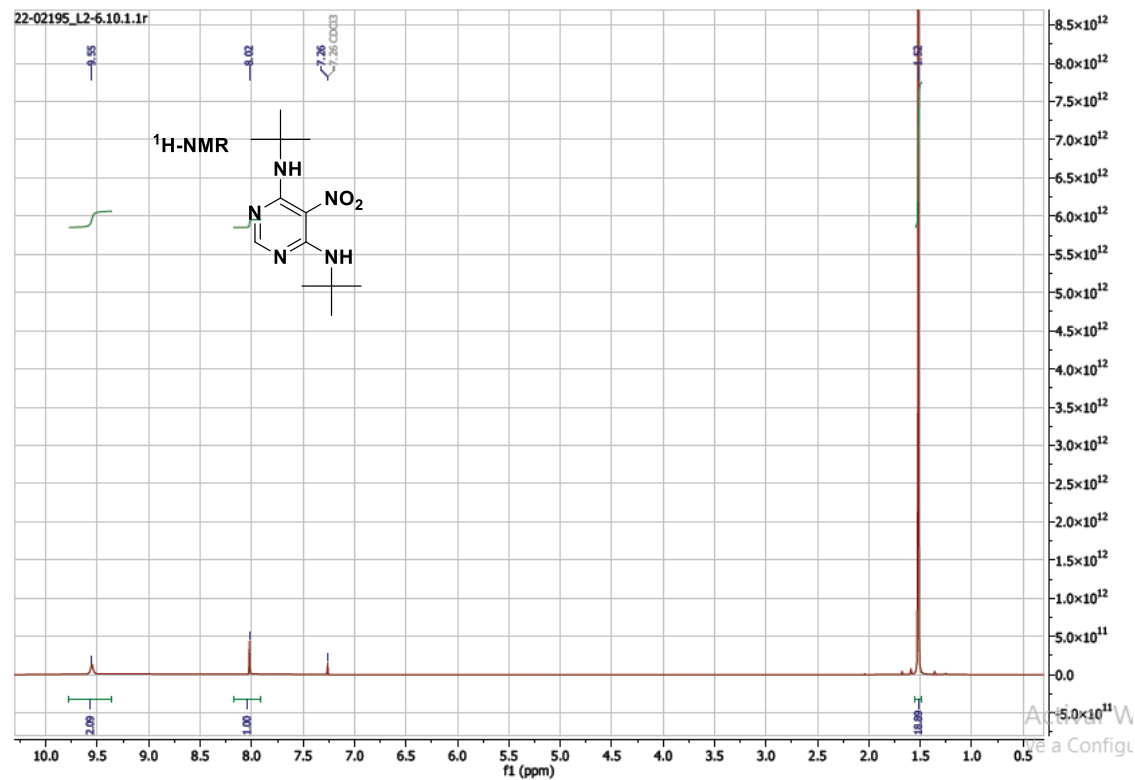

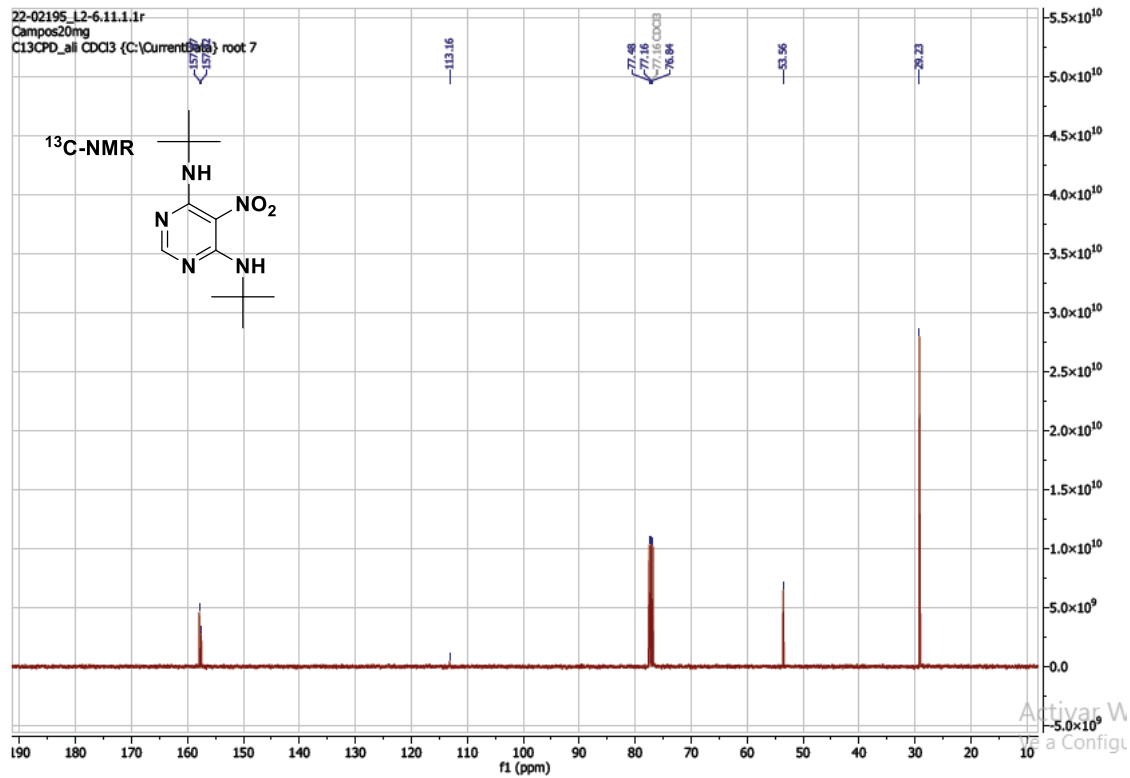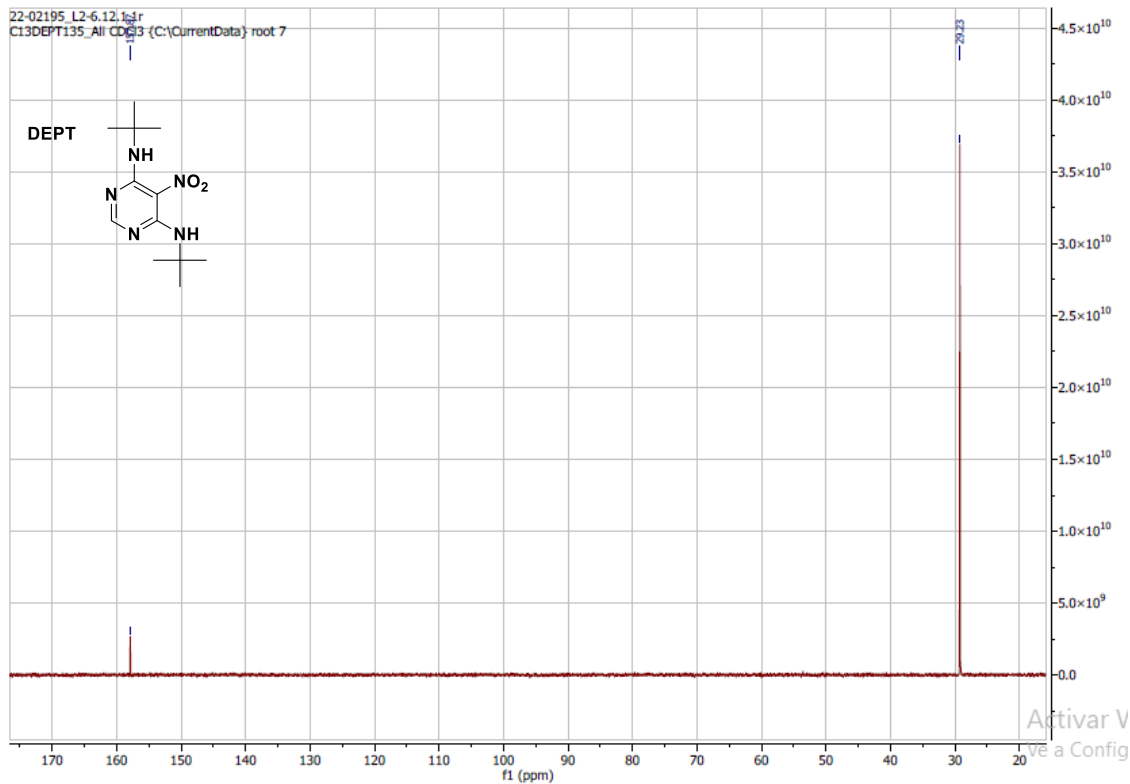

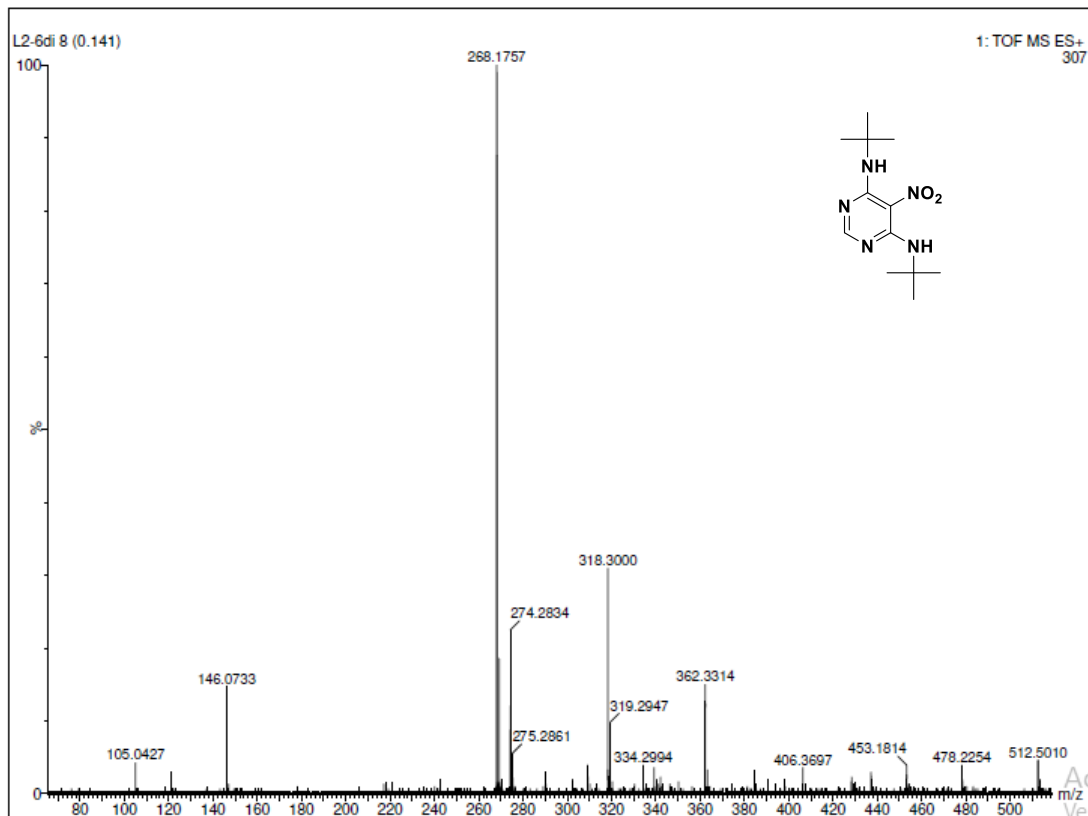

### Elemental Composition Report

#### Single Mass Analysis

Tolerance = 10.0 PPM / DBE: min = -1.5, max = 50.0  
 Element prediction: Off  
 Number of isotope peaks used for i-FIT = 3

Monoisotopic Mass, Even Electron Ions  
 76 formula(e) evaluated with 2 results within limits (up to 50 best isotopic matches for each mass)  
 Elements Used:  
 C: 0-12 H: 0-1000 N: 0-5 O: 0-7  
 L2-6di 8 (0.141)AM (Top,6, Ht,5000.0,0.00,1.00)  
 1: TOF MS ES+

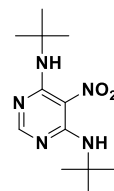

Page 1

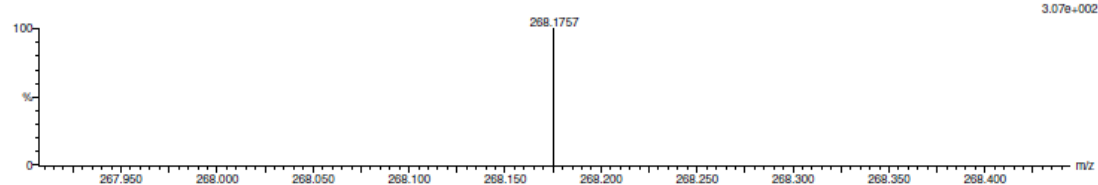

| Mass     | Calc. Mass | mDa  | PPM  | DBE  | 1-FIT | 1-FIT (Norm) | Formula       |
|----------|------------|------|------|------|-------|--------------|---------------|
| 268.1757 | 268.1774   | -1.7 | -6.3 | 4.5  | 20.9  | 1.2          | C12 H22 N5 O2 |
|          | 268.1760   | -0.3 | -1.1 | -0.5 | 20.1  | 0.4          | C11 H26 N O6  |

3.078+002

- $N^4,N^6$ -bis(4-chlorobenzyl)-5-nitropyrimidine-4,6-diamine (5f):

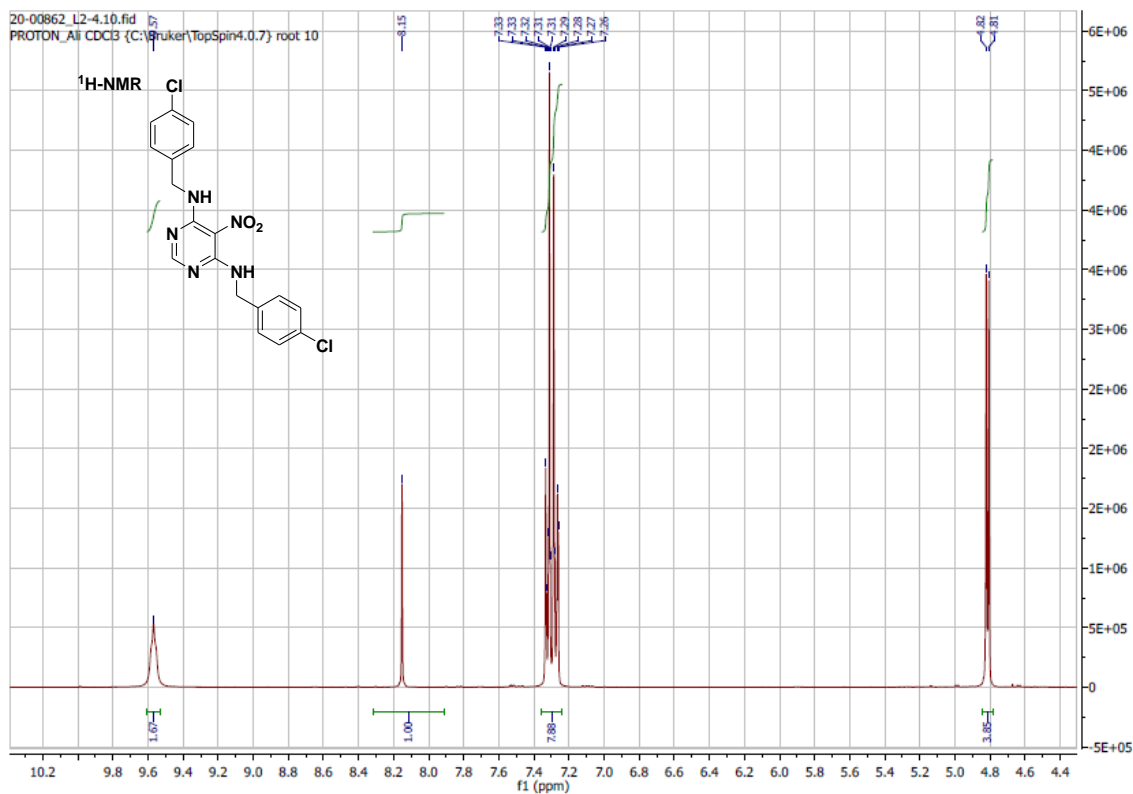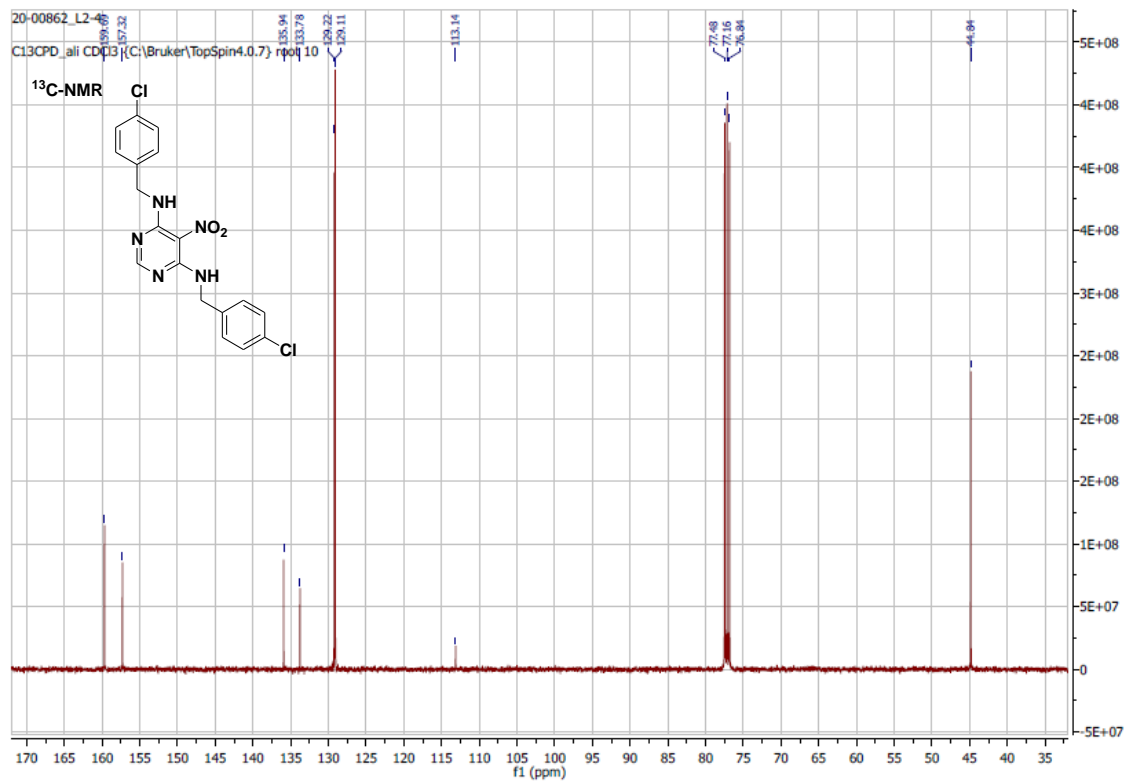

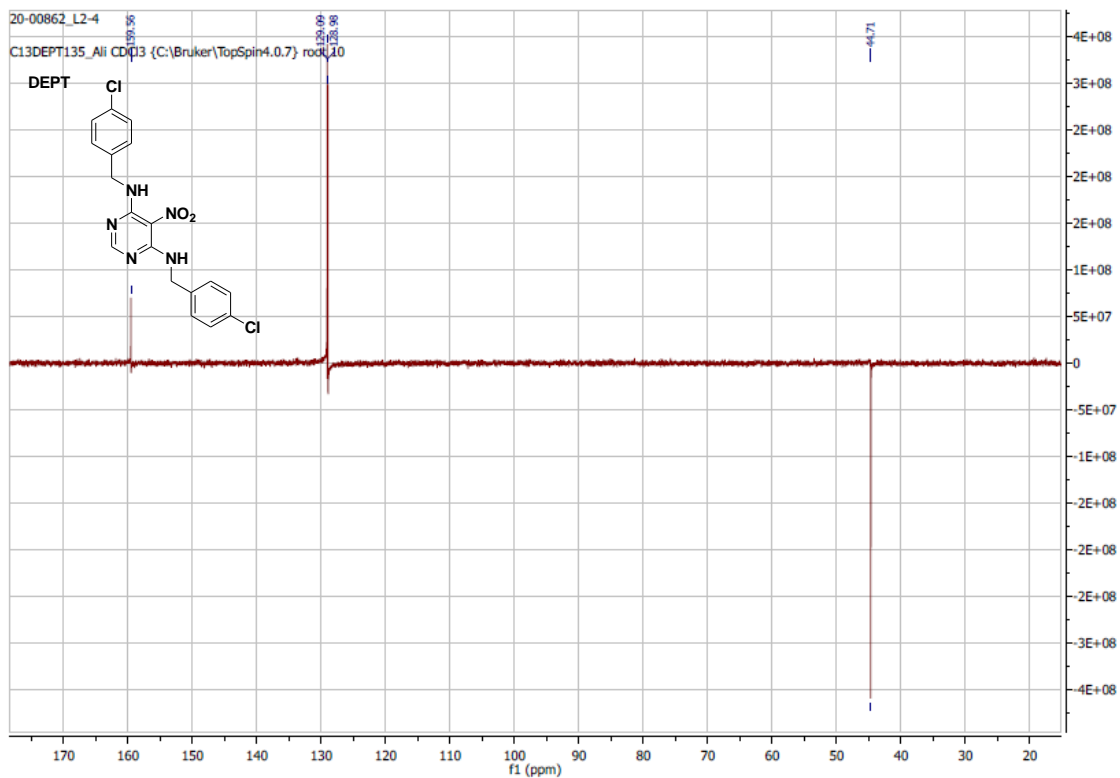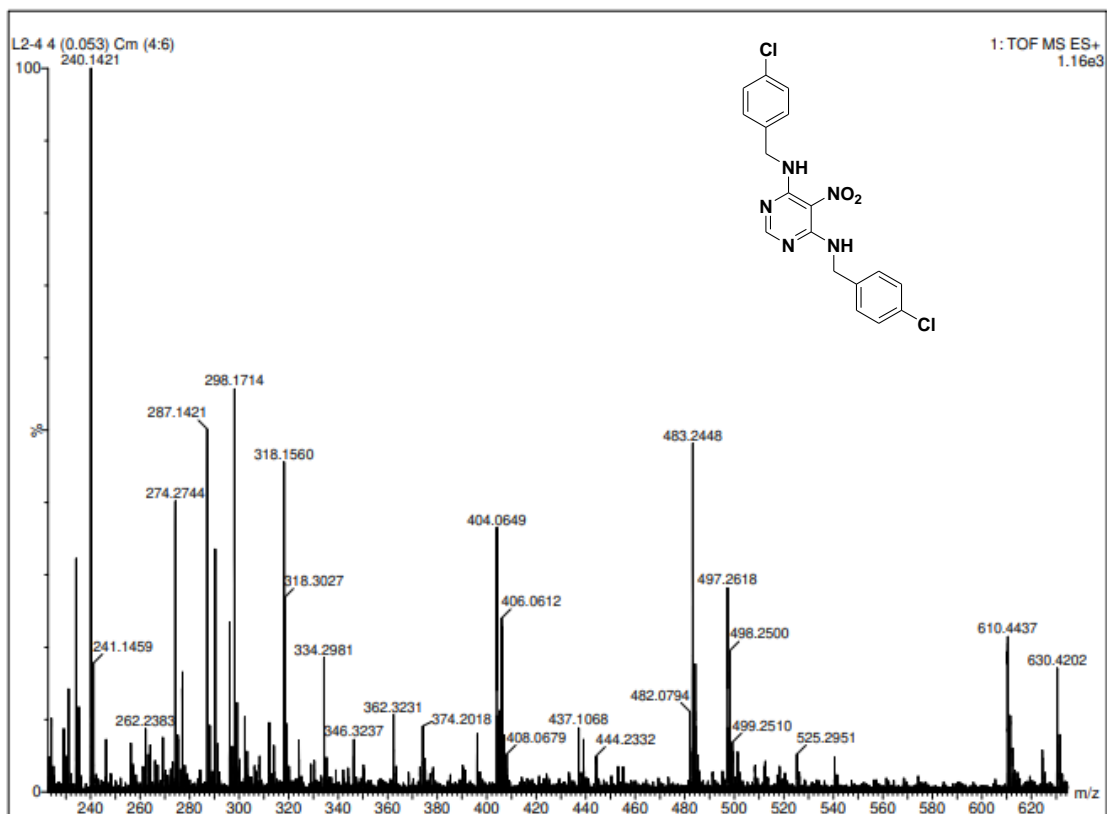

### Elemental Composition Report

#### Single Mass Analysis

Tolerance = 10.0 PPM / DBE: min = -1.5, max = 50.0

Element prediction: Off

Number of isotope peaks used for i-FIT = 3

Monoisotopic Mass, Even Electron Ions  
117 formula(e) evaluated with 1 results within limits (up to 50 closest results for each mass)  
Elements Used:

C: 0-18 H: 0-1000 N: 0-8 O: 0-2 Cl: 0-2

L2-4.4 (0.053)AM (Cen,6, 50.00, Ht,5000.0,0.00,1.00)

1: TOF MS ES+

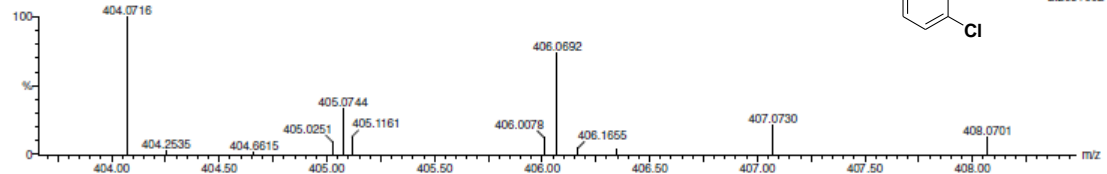

| Mass     | Calc. Mass | mDa | PPM | DBE  | 1-FIT | 1-FIT (Norm) | Formula           |
|----------|------------|-----|-----|------|-------|--------------|-------------------|
| 404.0716 | 404.0681   | 3.5 | 8.7 | 12.5 | 44.0  | 0.0          | C18 H16 N5 O2 Cl2 |

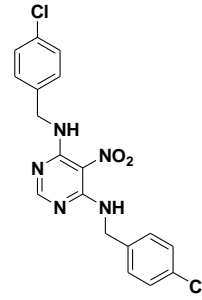

- **N<sup>4</sup>,N<sup>6</sup>-bis(4-bromobenzyl)-5-nitropyrimidine-4,6-diamine (5g):**



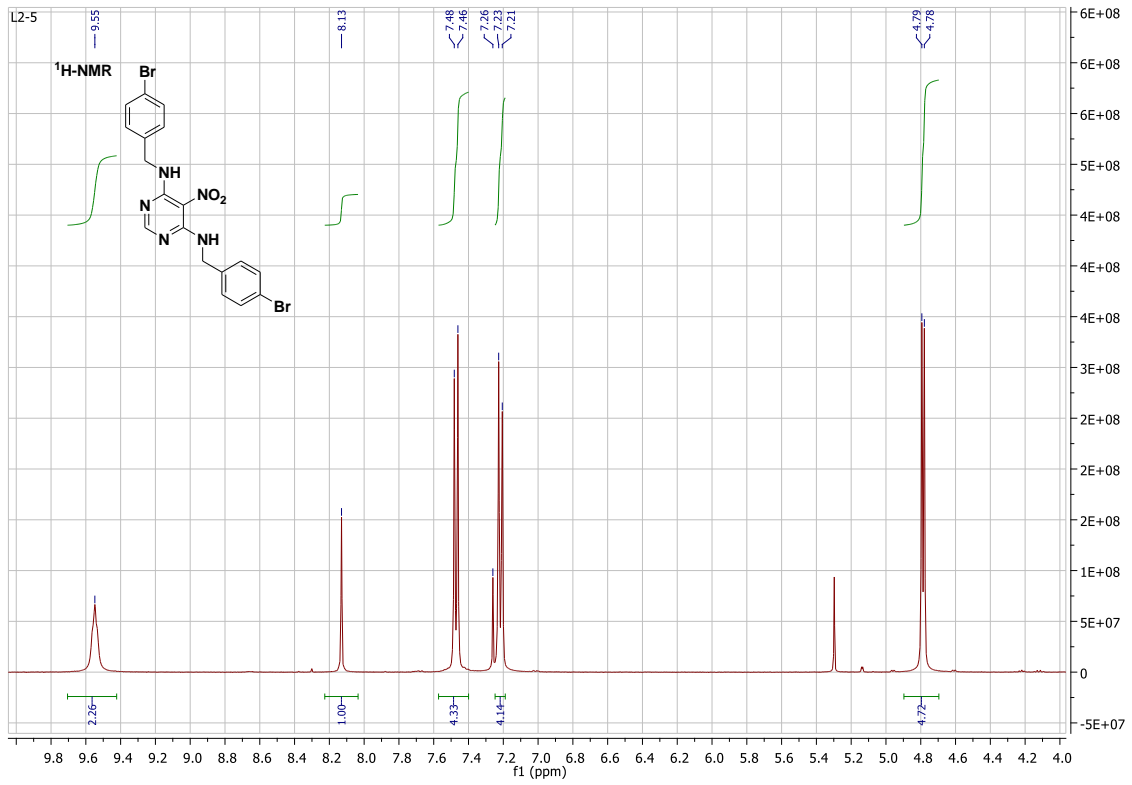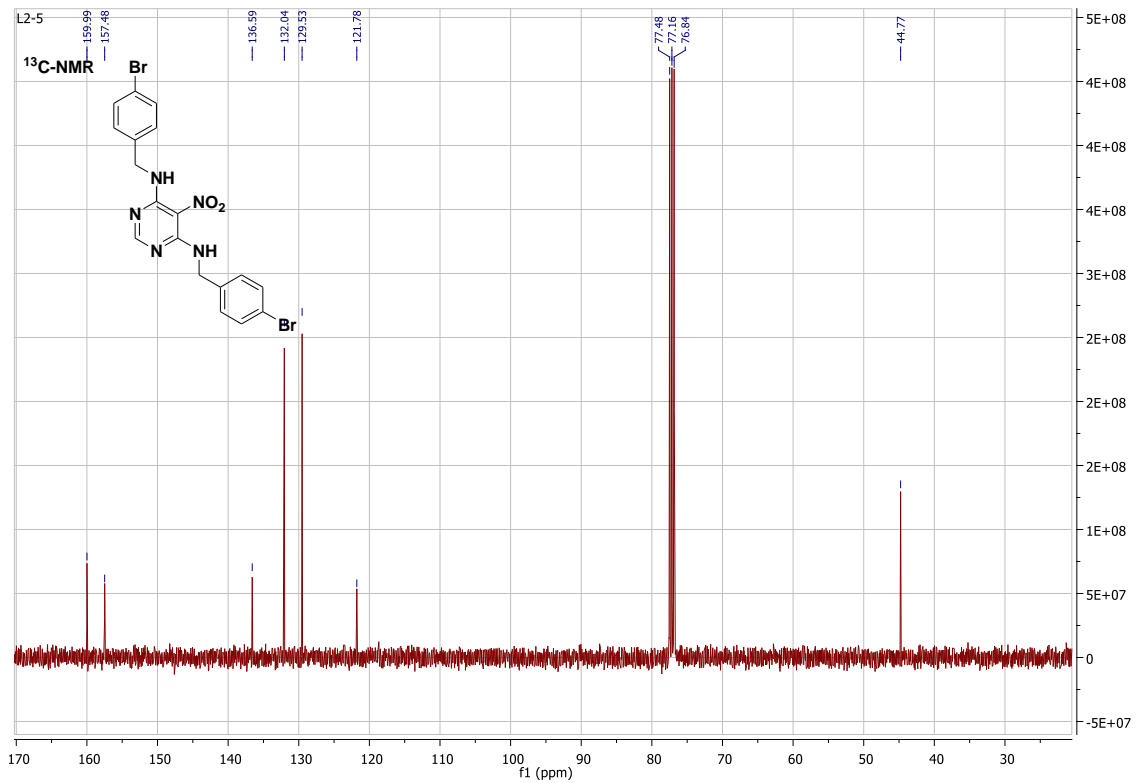

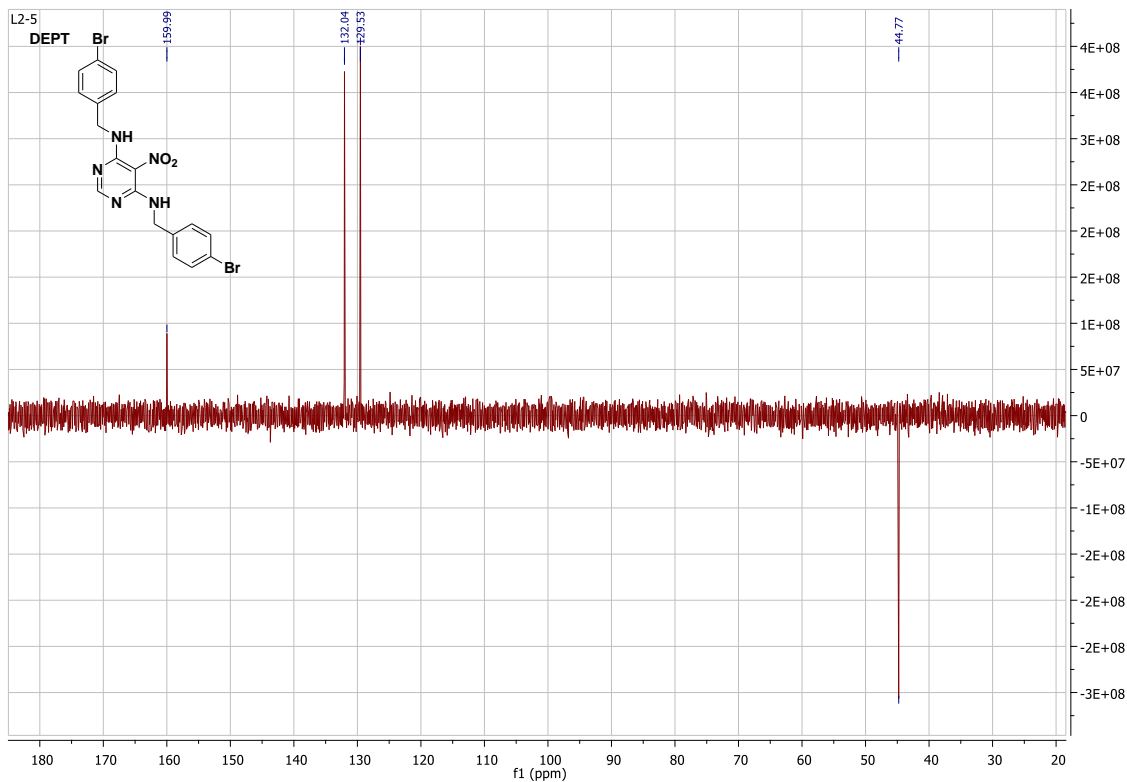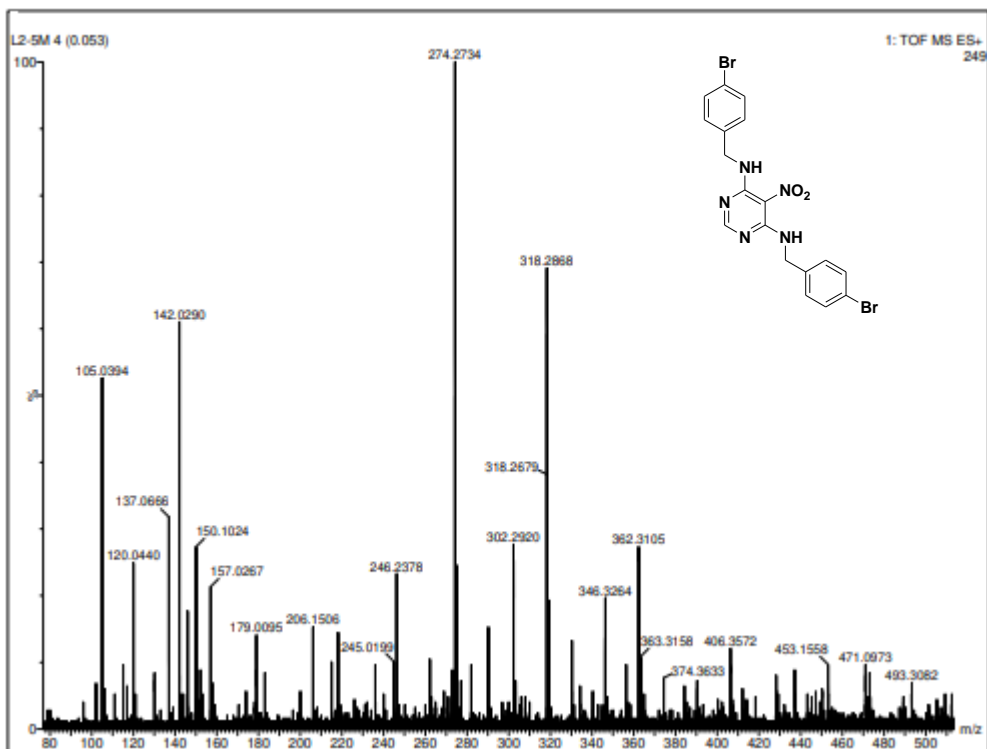

## Elemental Composition Report

Page 1

### Single Mass Analysis

Tolerance = 10.0 PPM / DBE: min = -1.5, max = 50.0

Element prediction: Off

Number of isotope peaks used for i-FIT = 3

Monoisotopic Mass, Even Electron Ions

125 formula(e) evaluated with 1 results within limits (up to 50 closest results for each mass)

Elements Used:

C: 0-18 H: 0-1000 N: 0-9 O: 0-2 Br: 0-2

11032020-L2-5pos 168 (3.665) AM (Top,2, Ht,5000.0,0.00,1.00)

1: TOF MS ES+

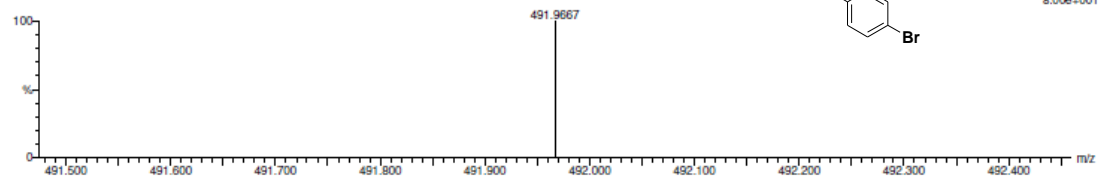

Minimum: -1.5  
Maximum: 5.0 10.0 50.0

| Mass     | Calc. Mass | mDa  | PPM  | DBE  | 1-FIT | 1-FIT (Norm) | Formula           |
|----------|------------|------|------|------|-------|--------------|-------------------|
| 491.9667 | 491.9671   | -0.4 | -0.8 | 12.5 | 19.7  | 0.0          | C18 H16 N5 O2 Br2 |

- **N<sup>4</sup>,N<sup>6</sup>-bis(4-bromophenethyl)-5-nitropyrimidine-4,6-diamine (5h):**

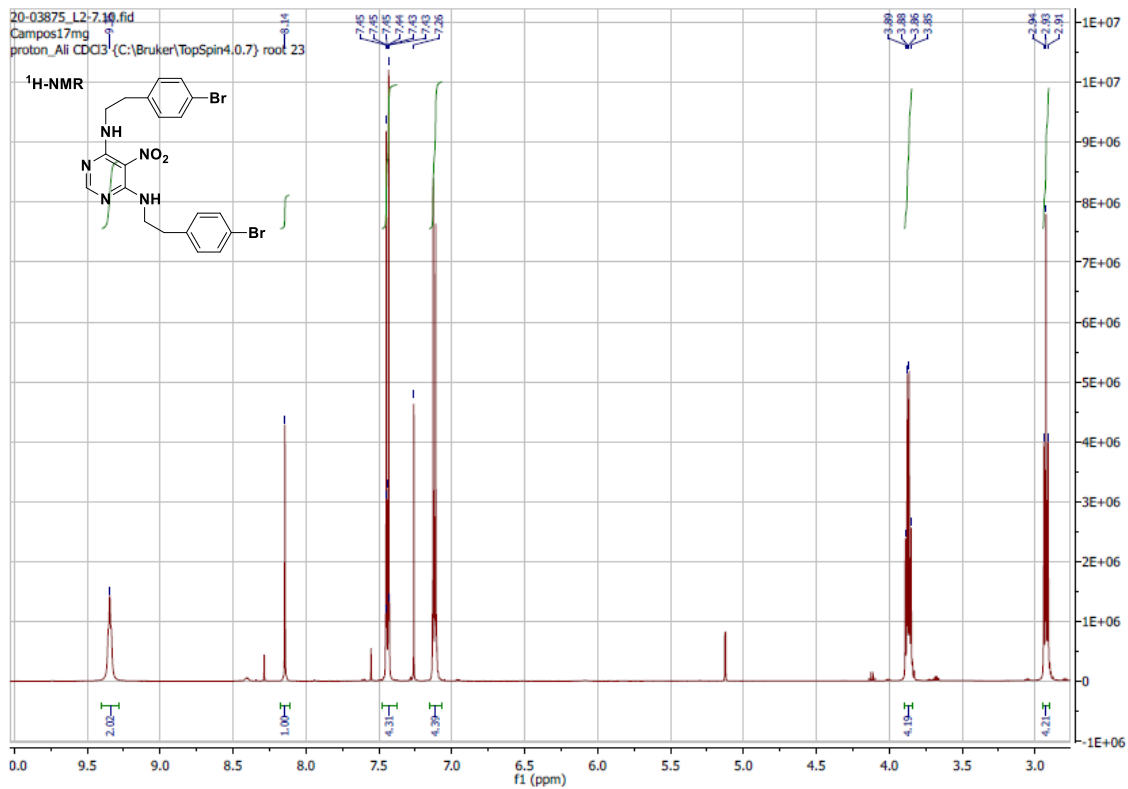

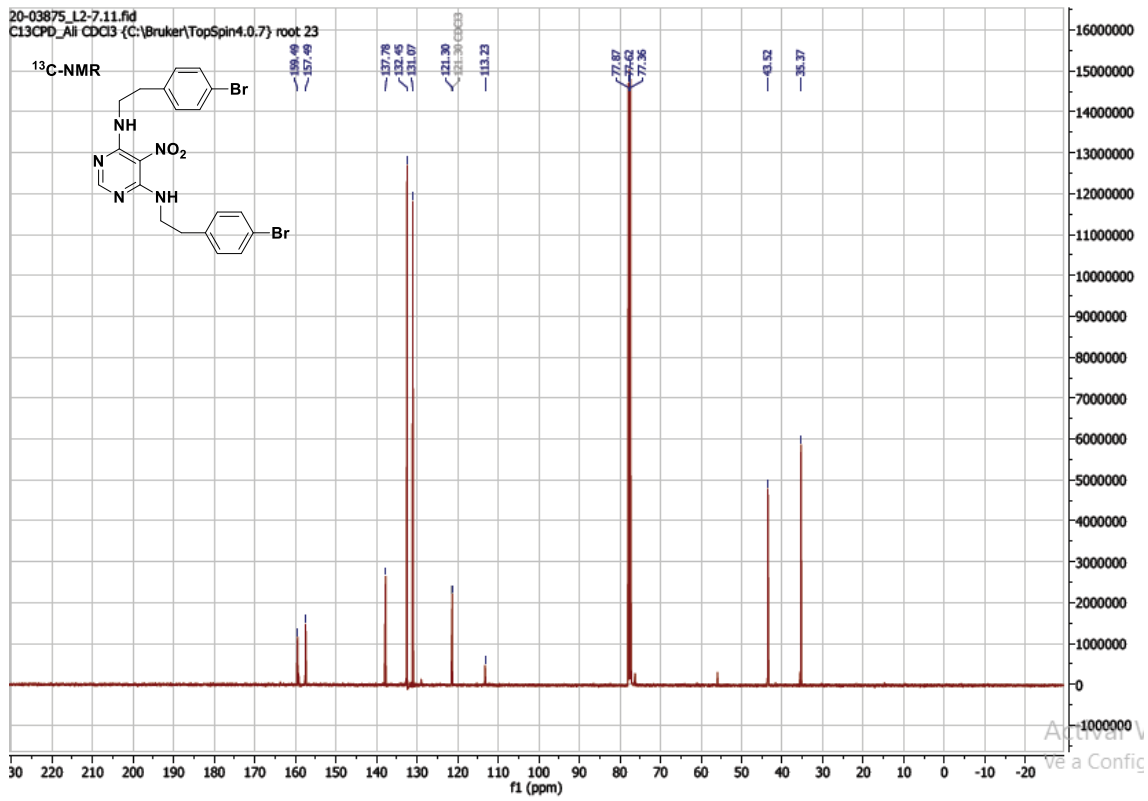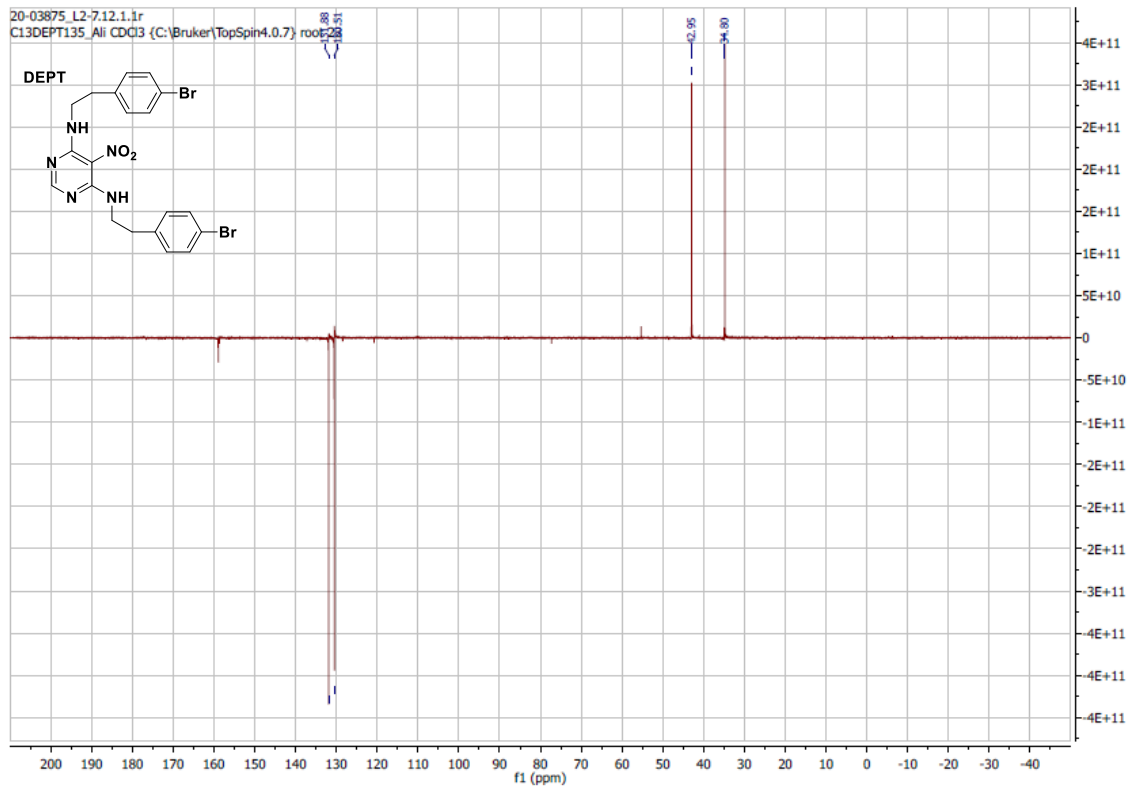

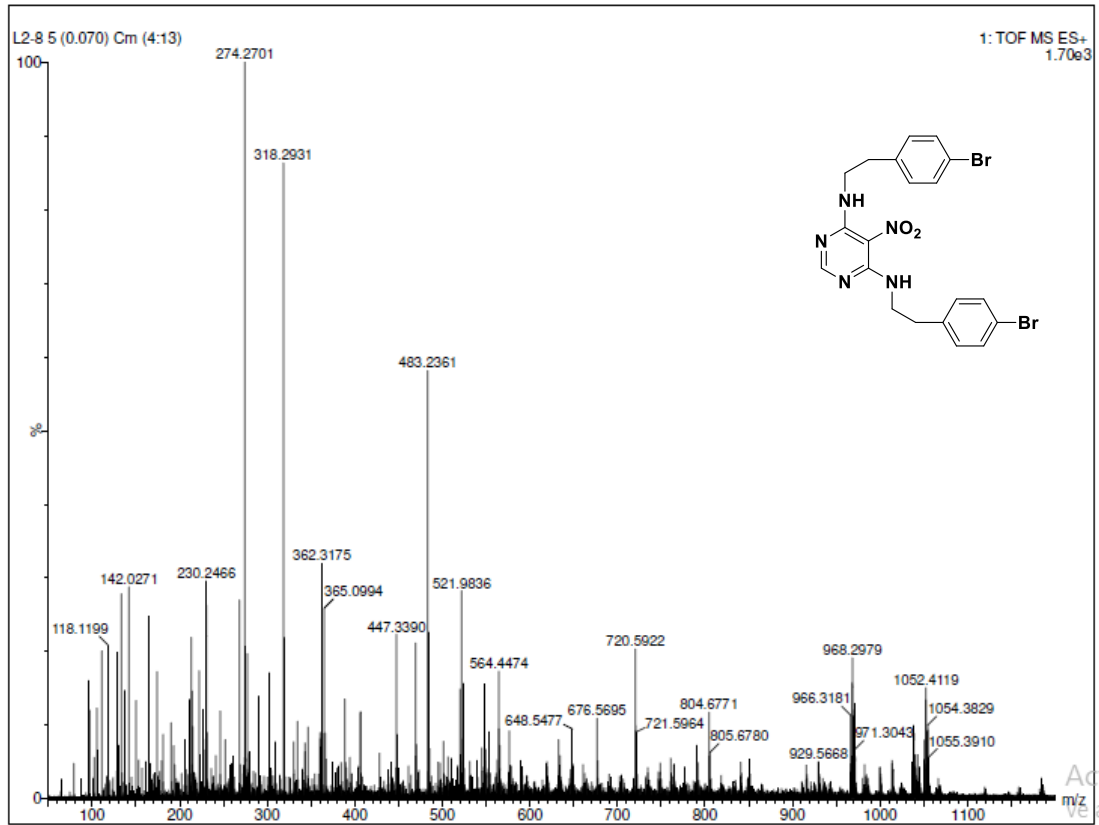

### Elemental Composition Report

#### Single Mass Analysis

Tolerance = 10.0 PPM / DBE: min = -1.5, max = 50.0  
 Element prediction: Off  
 Number of isotope peaks used for i-FIT = 3

Monoisotopic Mass, Odd and Even Electron Ions  
 58 formula(e) evaluated with 1 results within limits (up to 50 closest results for each mass)  
 Elements Used:  
 C: 0-20 H: 0-1000 N: 0-5 O: 0-2 Br: 0-2

L2-8 21 (0.422) AM (Top, 1, H, 5000, 0, 0, 0, 1, 00)  
 1: TOF MS ES+

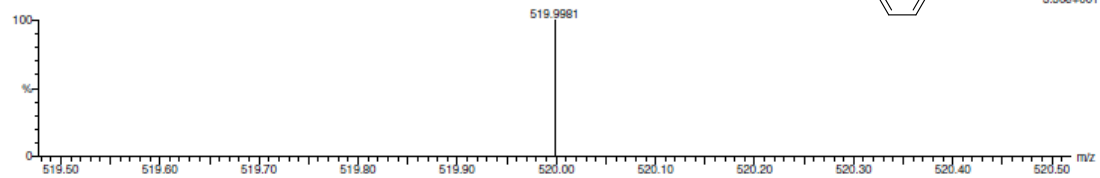

Minimum: 5.0 10.0 -1.5  
 Maximum: 50.0

| Mass     | Calc. Mass | mDa  | PPM  | DBE  | i-FIT | i-FIT (Norm) | Formula           |
|----------|------------|------|------|------|-------|--------------|-------------------|
| 519.9981 | 519.9984   | -0.3 | -0.6 | 12.5 | 17.9  | 0.0          | C20 H20 N5 O2 Br2 |

• **N<sup>4</sup>,N<sup>6</sup>-bis(3-chlorobenzyl)-5-nitropyrimidine-4,6-diamine (5i):**

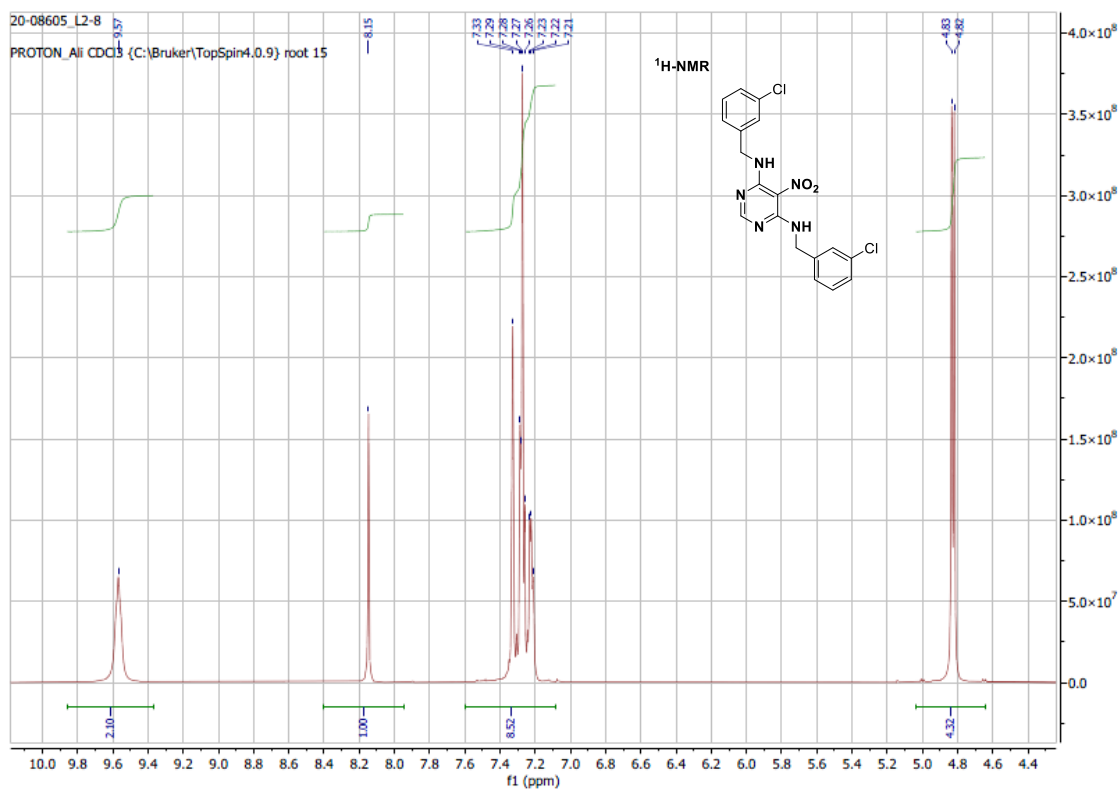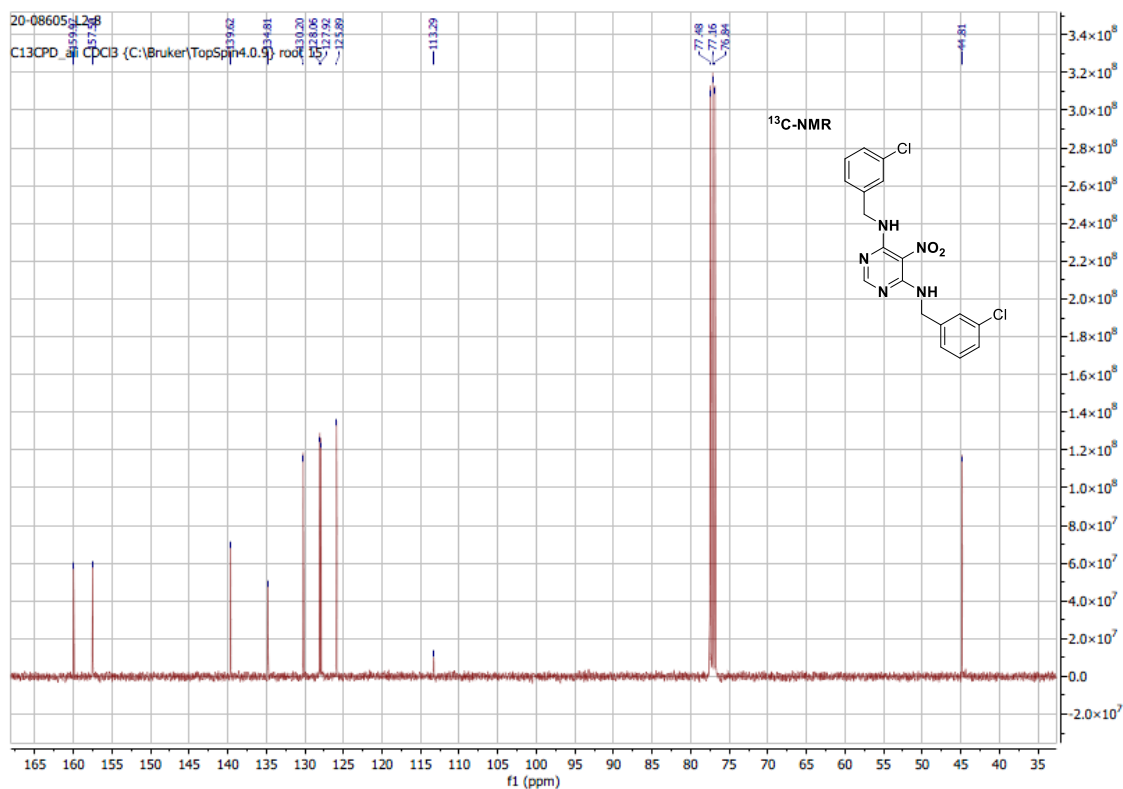

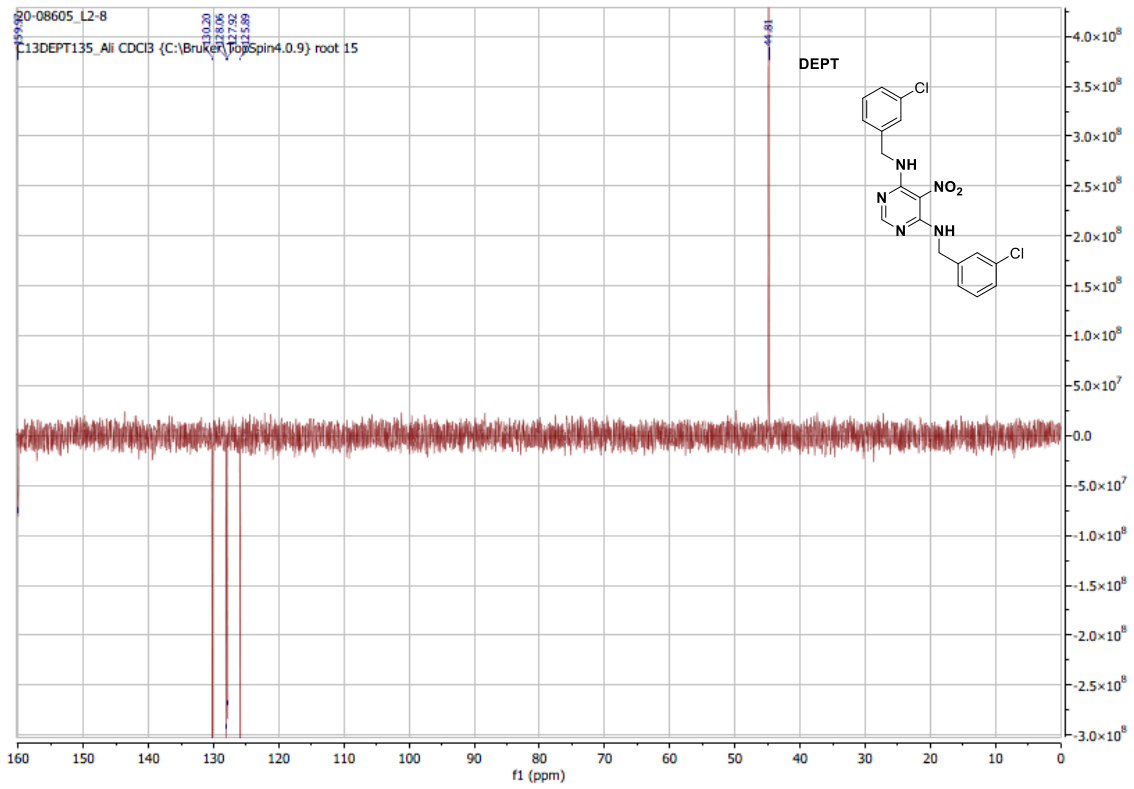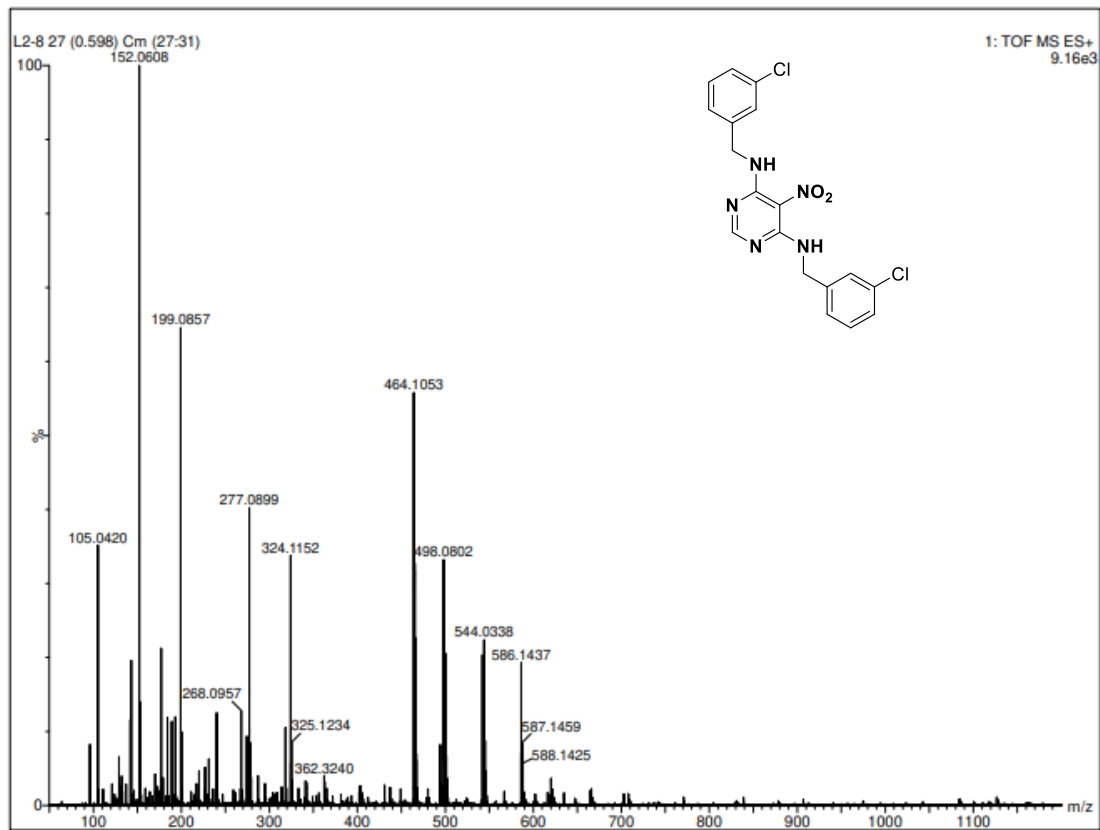

### Elemental Composition Report

#### Single Mass Analysis

Tolerance = 10.0 PPM / DBE: min = -1.5, max = 50.0

Element prediction: Off

Number of isotope peaks used for i-FIT = 3

Monoisotopic Mass, Even Electron Ions

58 formula(e) evaluated with 1 results within limits (up to 50 closest results for each mass)

Elements Used:

C: 0-18 H: 0-1000 N: 0-5 O: 0-2 Cl: 0-2

L2-6 27 (0.698) AM (Cen,6, 80.00, Ht,5000.0,0.00,1.00); Cm (27.31)

1: TOF MS ES+

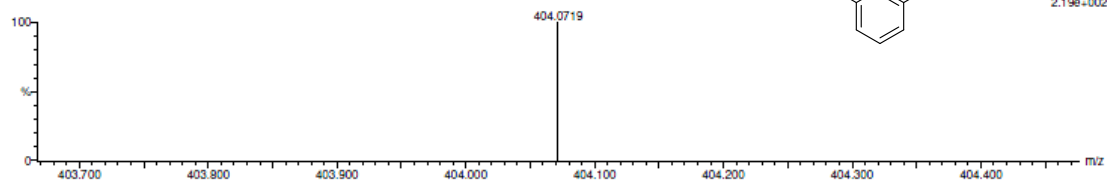

| Mass     | Calc. Mass | mDa | PPM | DBE  | 1-FIT | 1-FIT (Norm) | Formula           |
|----------|------------|-----|-----|------|-------|--------------|-------------------|
| 404.0719 | 404.0681   | 3.8 | 9.4 | 12.5 | 22.3  | 0.0          | C18 H16 N5 O2 Cl2 |

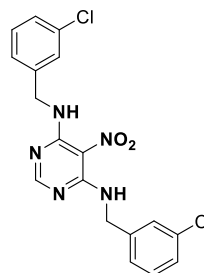

2.19e+002

- **N<sup>4</sup>,N<sup>6</sup>-bis(2-chlorobenzyl)-5-nitropyrimidine-4,6-diamine (5j):**

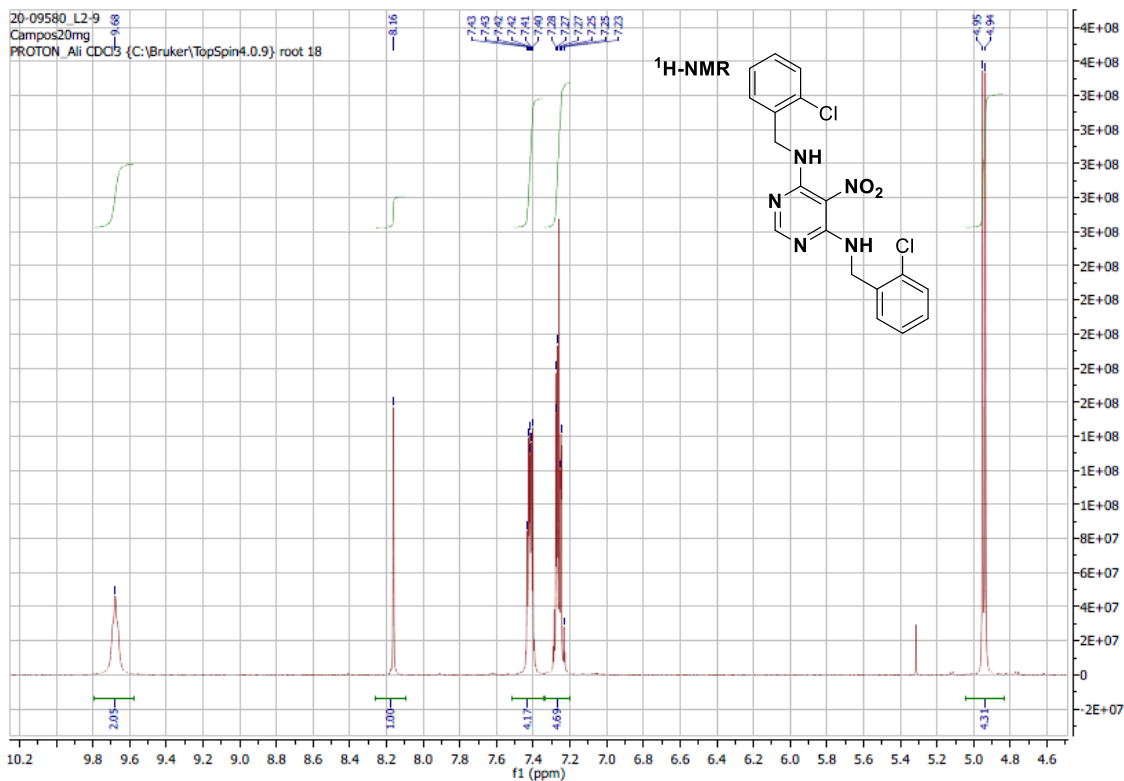



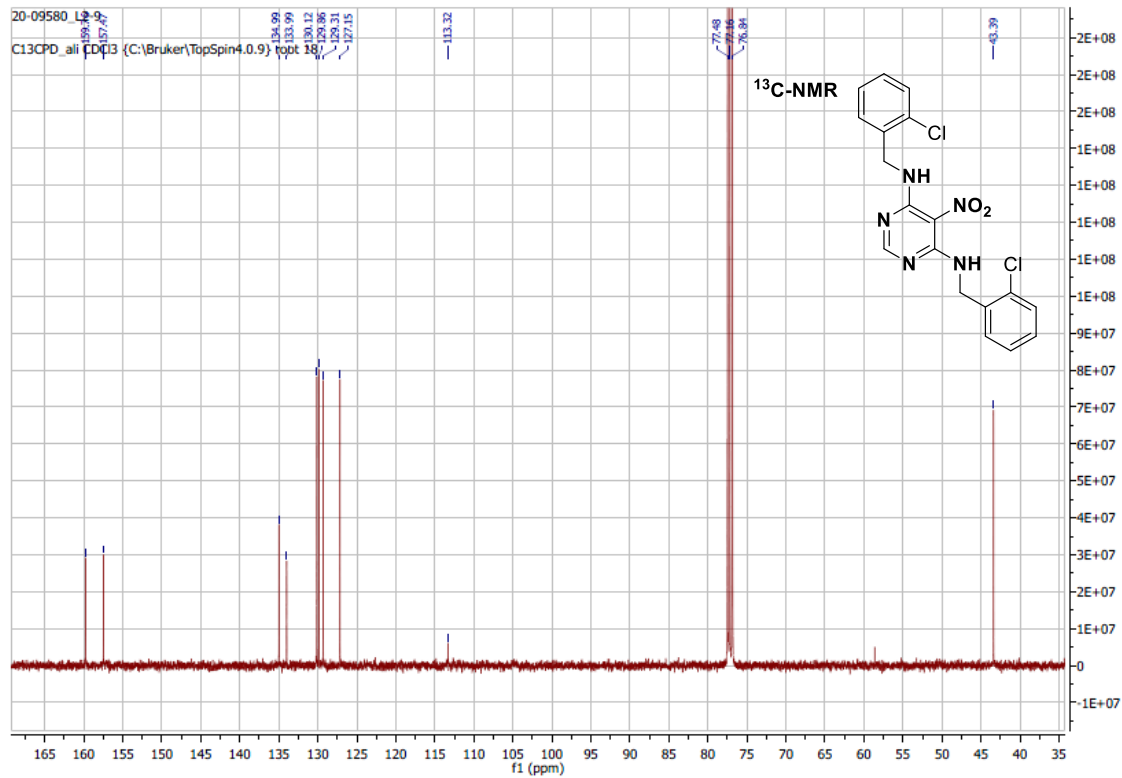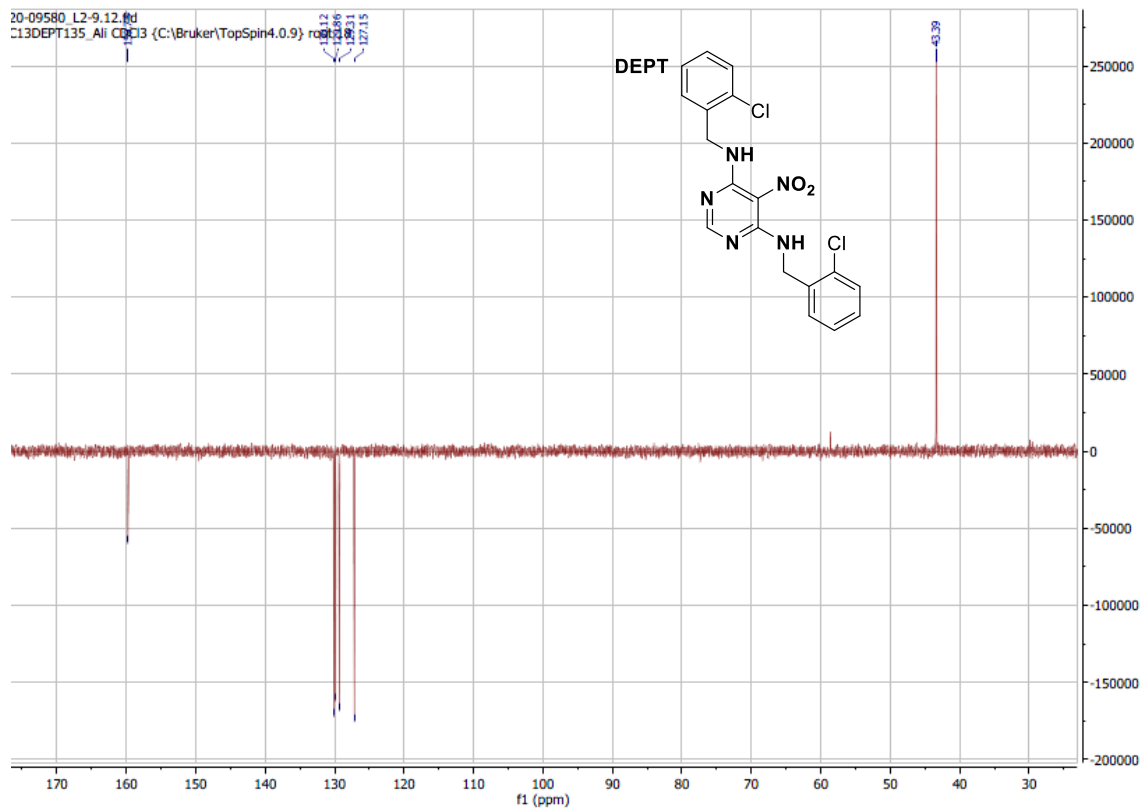

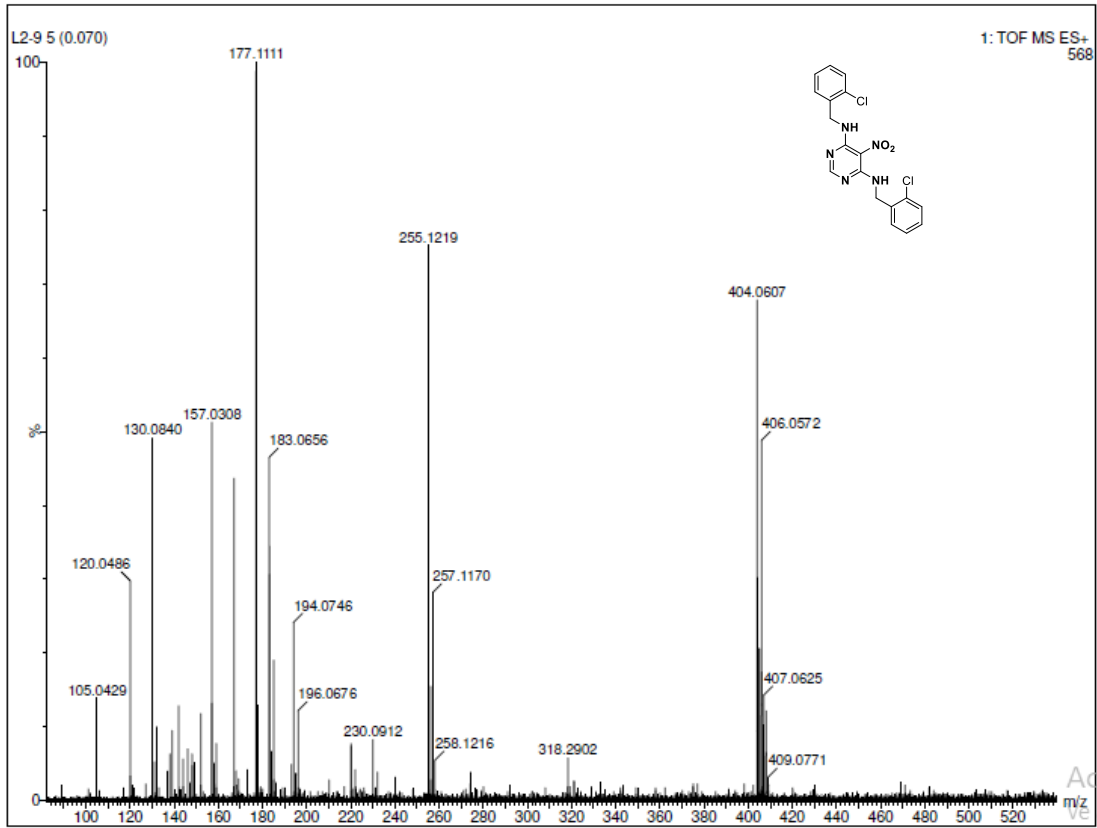

**Elemental Composition Report**

**Single Mass Analysis**

Tolerance = 10.0 PPM / DBE: min = -1.5, max = 50.0

Element prediction: Off

Number of isotope peaks used for i-FIT = 3

Monoisotopic Mass, Even Electron Ions

145 formula(e) evaluated with 1 results within limits (up to 50 closest results for each mass)

Elements Used:

C: 0-18 H: 0-1000 N: 0-5 O: 0-5 Cl: 0-2

L2-9 21 (0.422) AM (Cen.6, 100.00, Ht.5000.0,0.00,1.00)

1: TOF MS ES+

Page 1

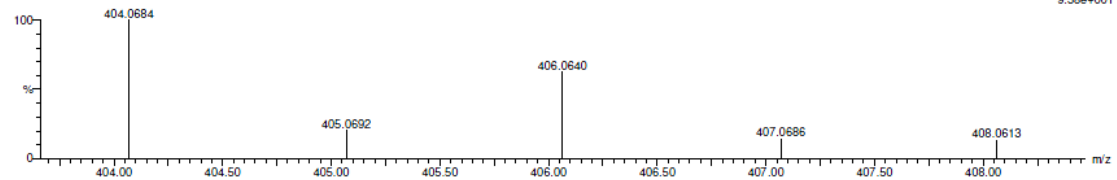

9.38e+001

Minimum: 5.0 10.0 -1.5  
 Maximum: 5.0 50.0 50.0

| Mass     | Calc. Mass | mDa | PPM | DBE  | i-FIT | i-FIT (Norm) | Formula           |
|----------|------------|-----|-----|------|-------|--------------|-------------------|
| 404.0684 | 404.0681   | 0.3 | 0.7 | 12.5 | 5.6   | 0.0          | C18 H16 N5 O2 Cl2 |

- $N^4,N^6$ -diethyl-5-nitropyrimidine-4,6-diamine (5k):

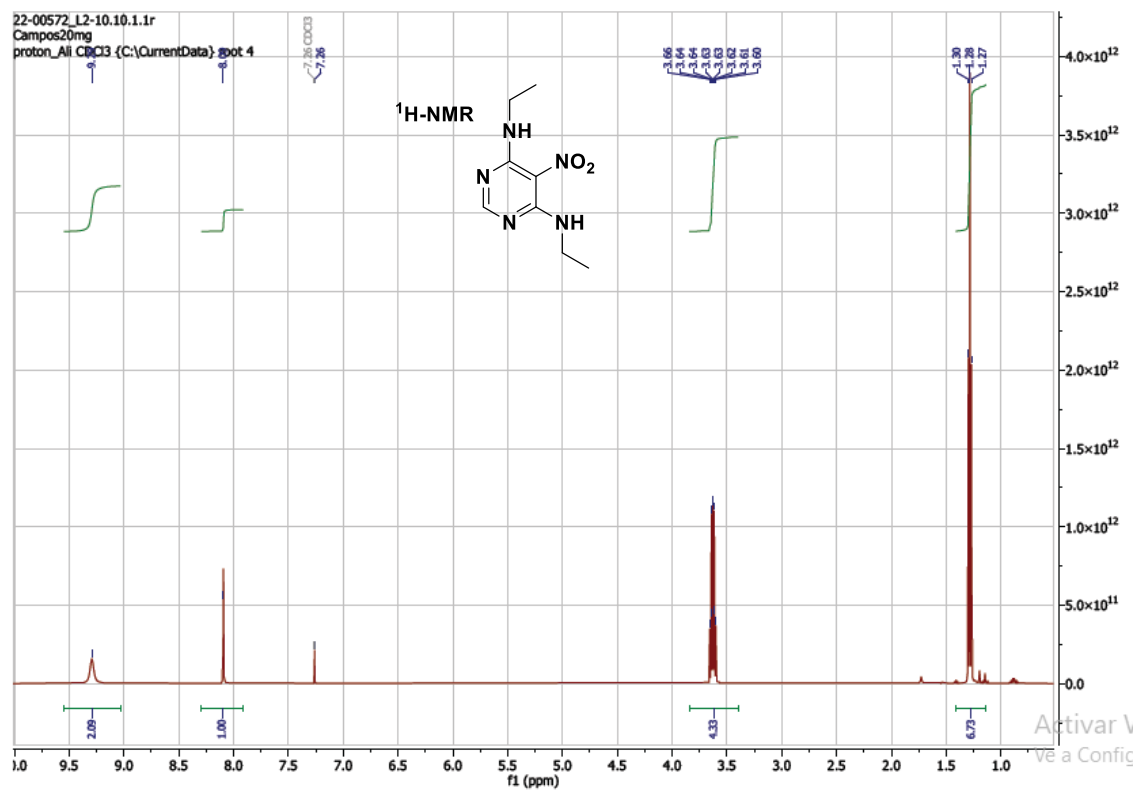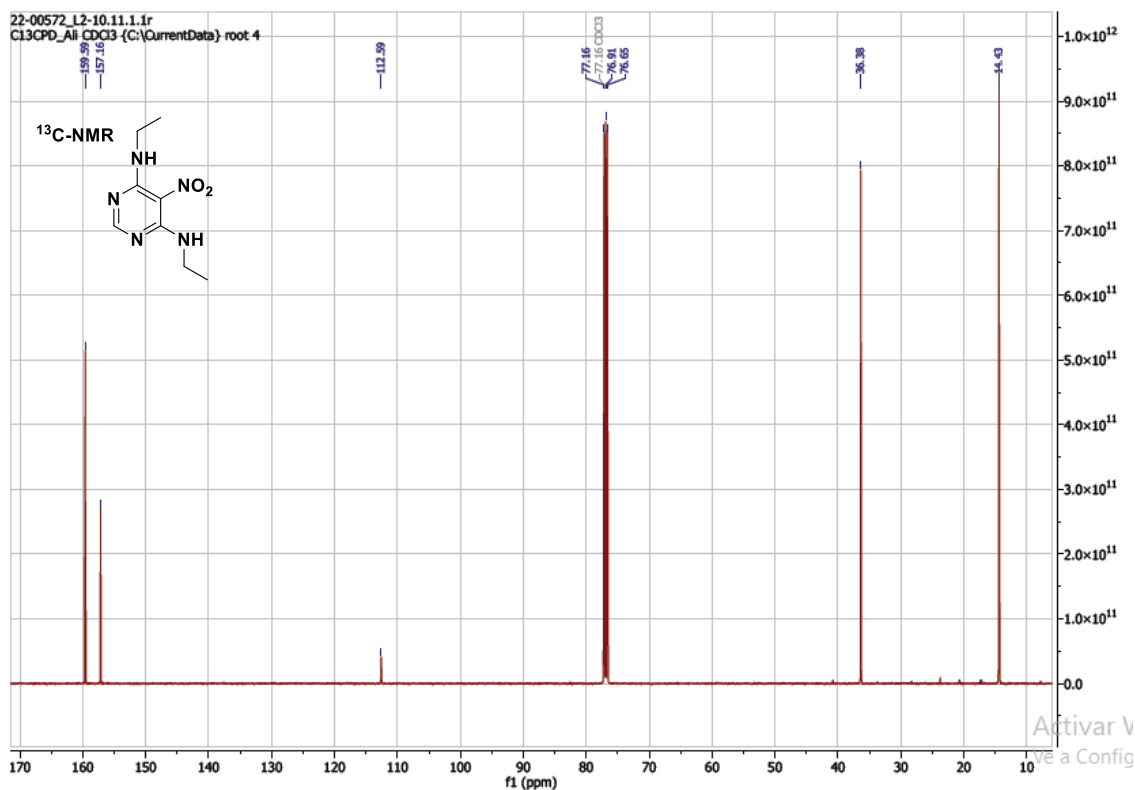

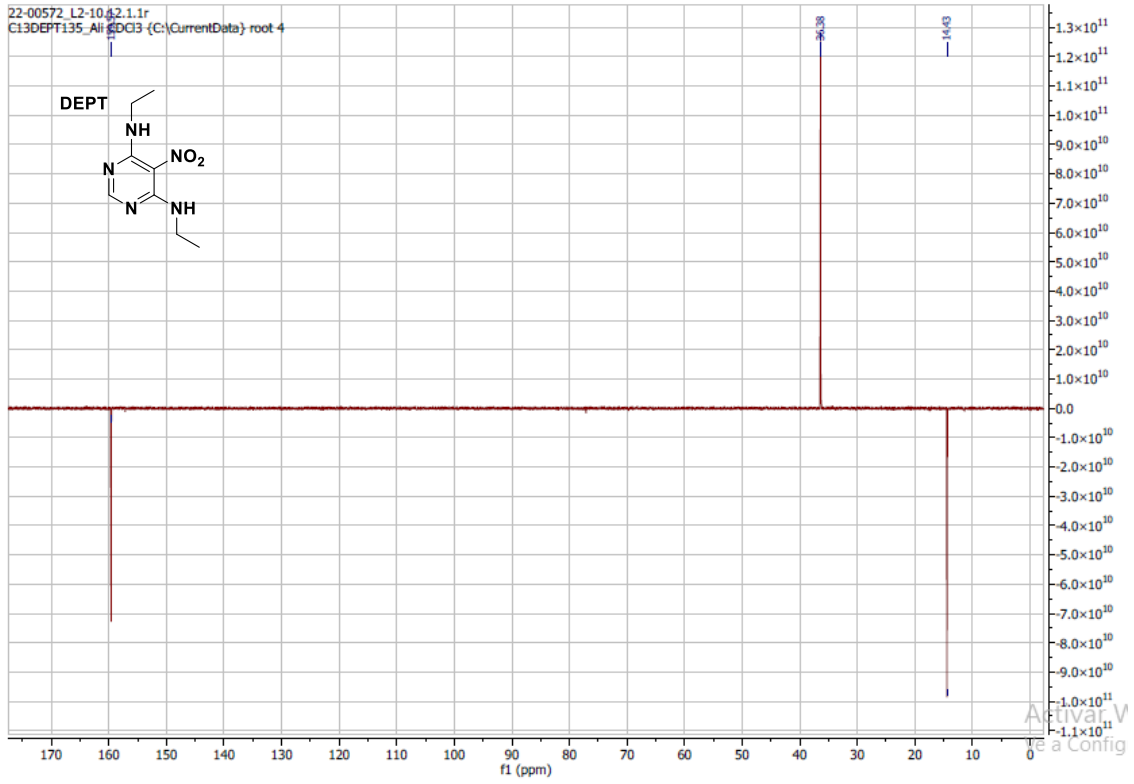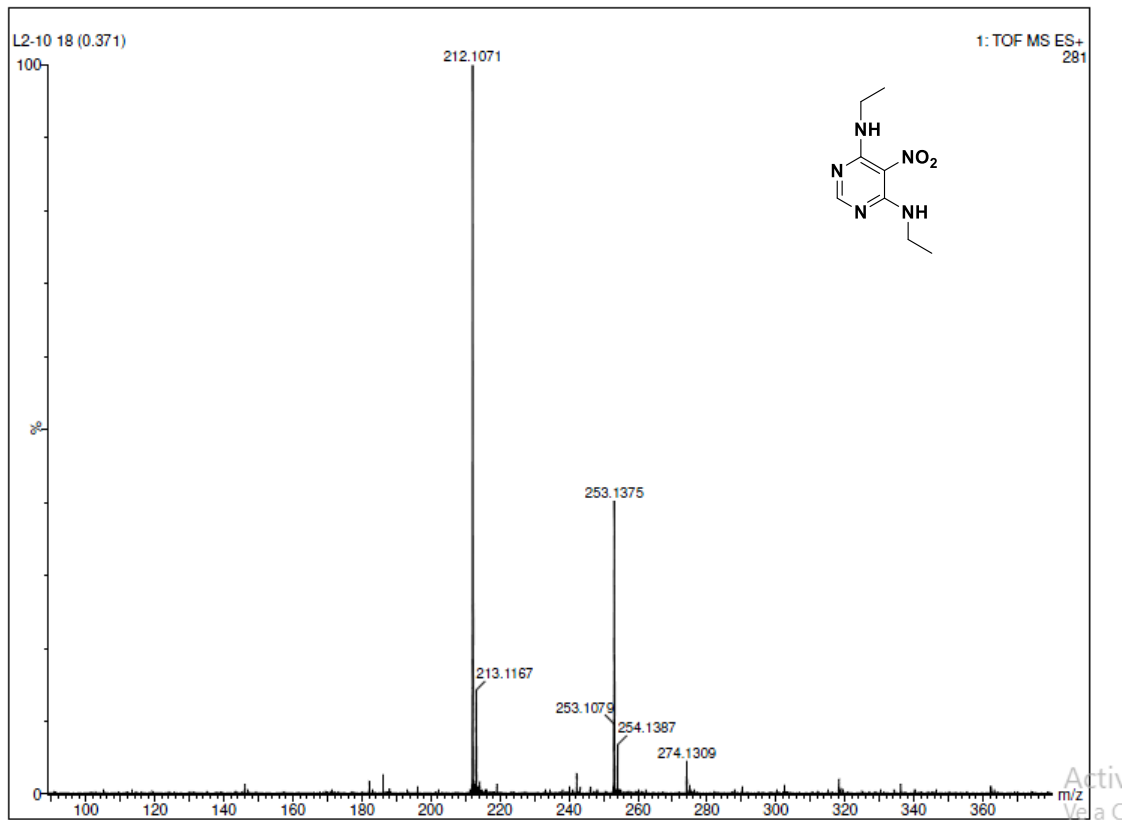

Elemental Composition Report

Single Mass Analysis

Tolerance = 10.0 PPM / DBE: min = -1.5, max = 50.0  
 Element prediction: Off  
 Number of isotope peaks used for i-FIT = 3

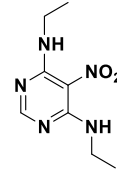

Monoisotopic Mass, Even Electron Ions  
 144 formula(e) evaluated with 2 results within limits (up to 50 best isotopic matches for each mass)  
 Elements Used:  
 C: 0-8 H: 0-1000 N: 0-8 O: 0-18  
 L2:10.6 (0.145) AM (Top,6, Ht,5000.0,0.00,1.00)  
 1: TOF MS ES+

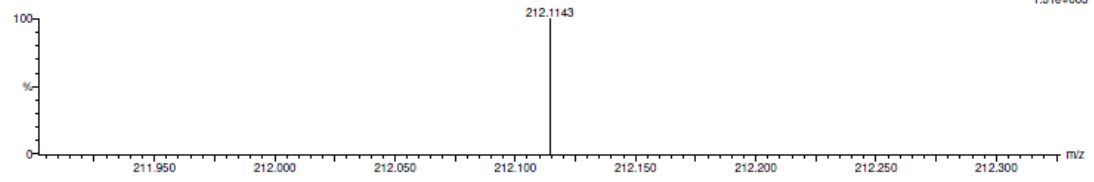

| Mass     | Calc. Mass | mDa  | PPM  | DBE  | 1-FIT | 1-FIT (Norm) | Formula      |
|----------|------------|------|------|------|-------|--------------|--------------|
| 212.1143 | 212.1147   | -0.4 | -1.9 | 4.5  | 23.4  | 0.7          | C8 H14 N5 O2 |
|          | 212.1134   | 0.9  | 4.2  | -0.5 | 23.5  | 0.7          | C7 H18 N O6  |

- N<sup>4</sup>,N<sup>6</sup>-diisobutyl-5-nitropyrimidine-4,6-diamine (5I):

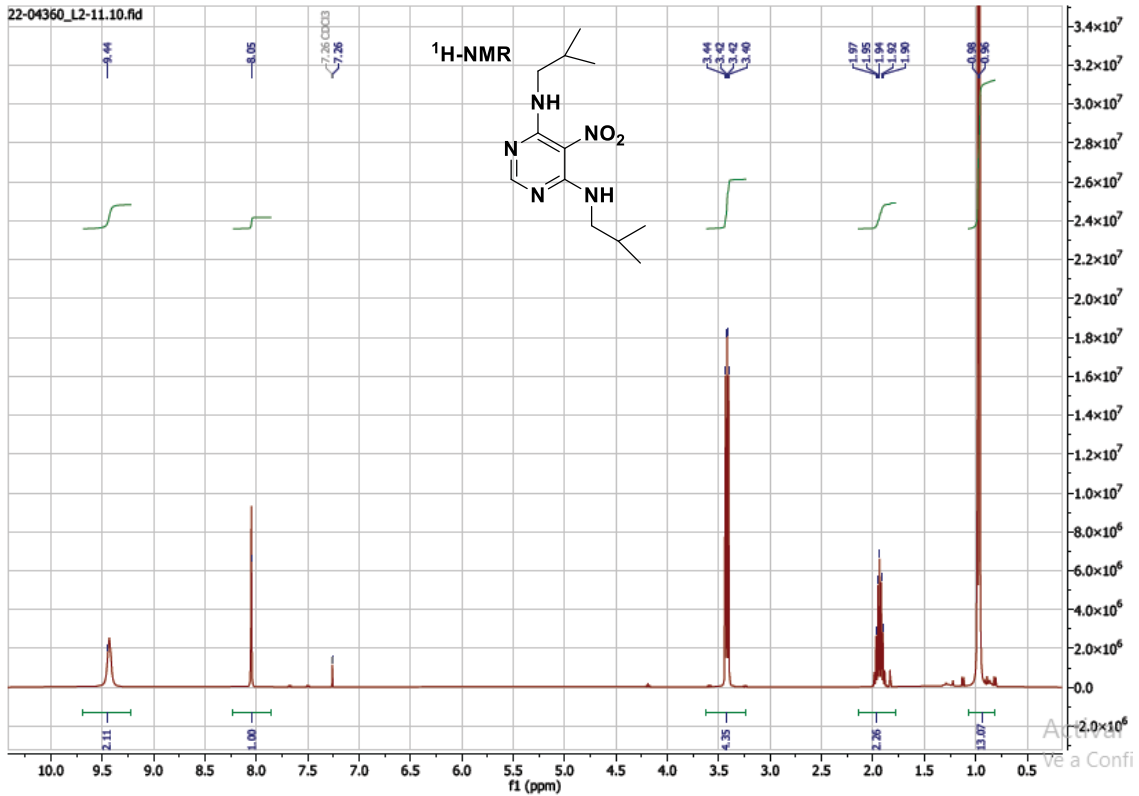

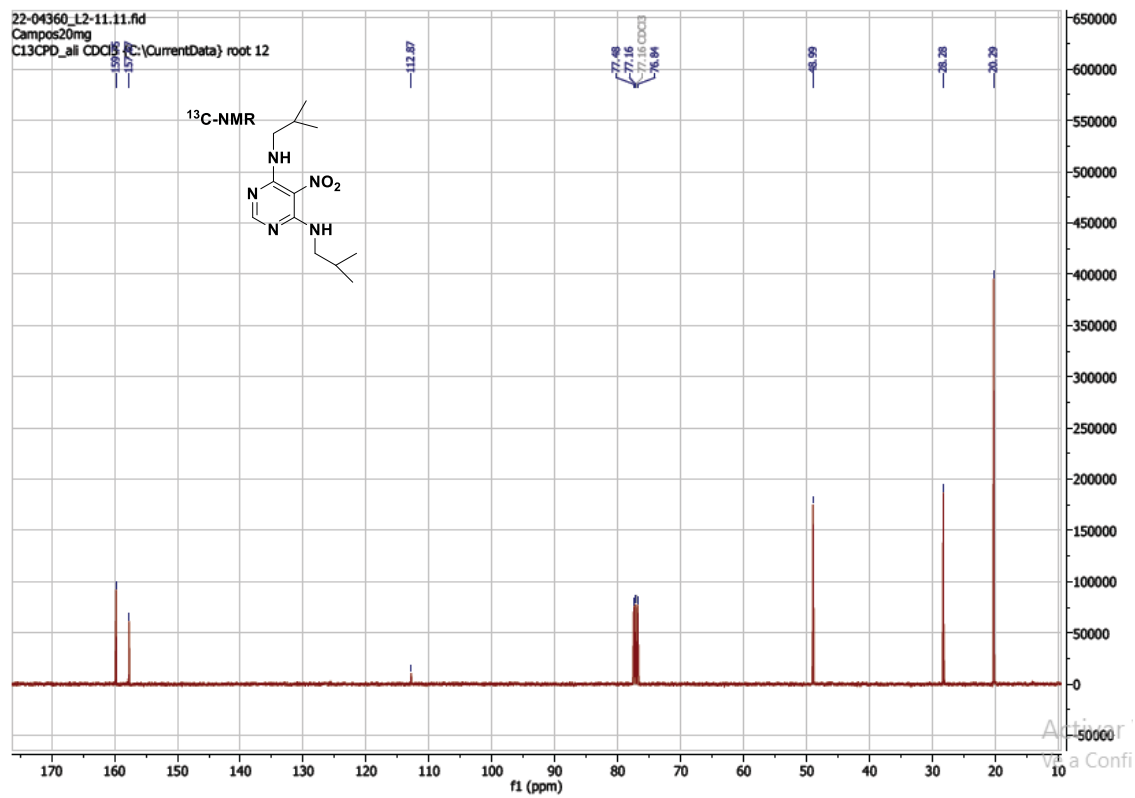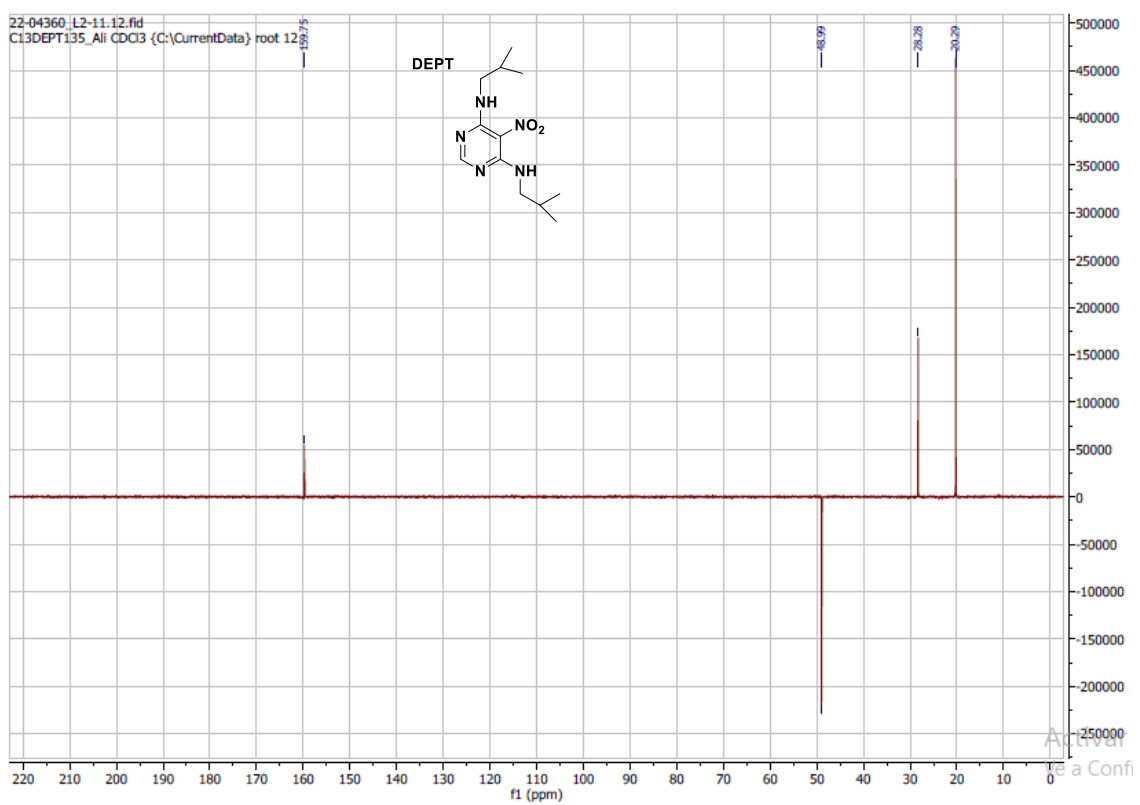

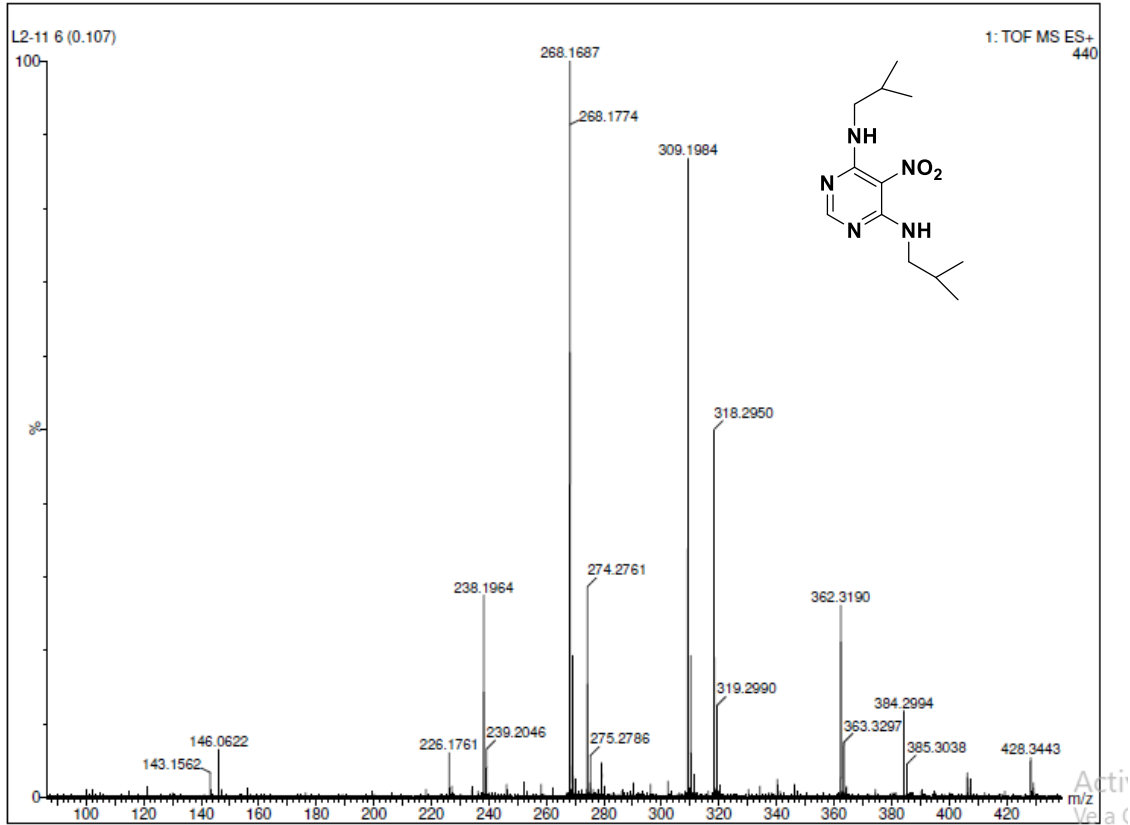

### Elemental Composition Report

Page 1

#### Single Mass Analysis

Tolerance = 10.0 PPM / DBE: min = -1.5, max = 50.0

Element prediction: Off

Number of isotope peaks used for i-FIT = 3

Monoisotopic Mass, Even Electron Ions

190 formula(e) evaluated with 1 results within limits (up to 50 best isotopic matches for each mass)

Elements Used:

C: 0-20 H: 0-1000 N: 0-5 O: 0-5 I: 0-1

L2-11 9 (0.158) AM (Top 6, Ht:5000.0,0.00,1.00)

1: TOF MS ES+

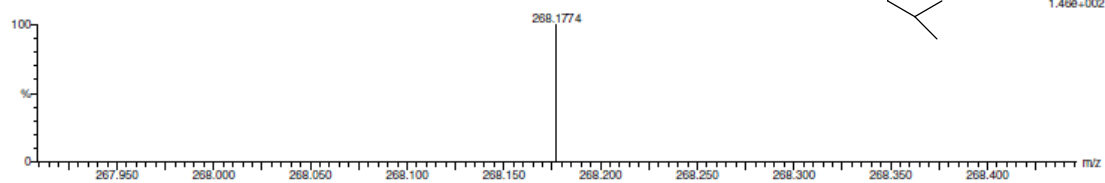

Minimum: -1.5

Maximum: 50.0

| Mass     | Calc. Mass | mDa | PPM | DBE | 1-FIT | 1-FIT (Norm) | Formula       |
|----------|------------|-----|-----|-----|-------|--------------|---------------|
| 268.1774 | 268.1774   | 0.0 | 0.0 | 4.5 | 18.3  | 0.0          | C12 H22 N5 O2 |

- 5-Amino-4-tert-butylamino-6-chloropyrimidine (6b):

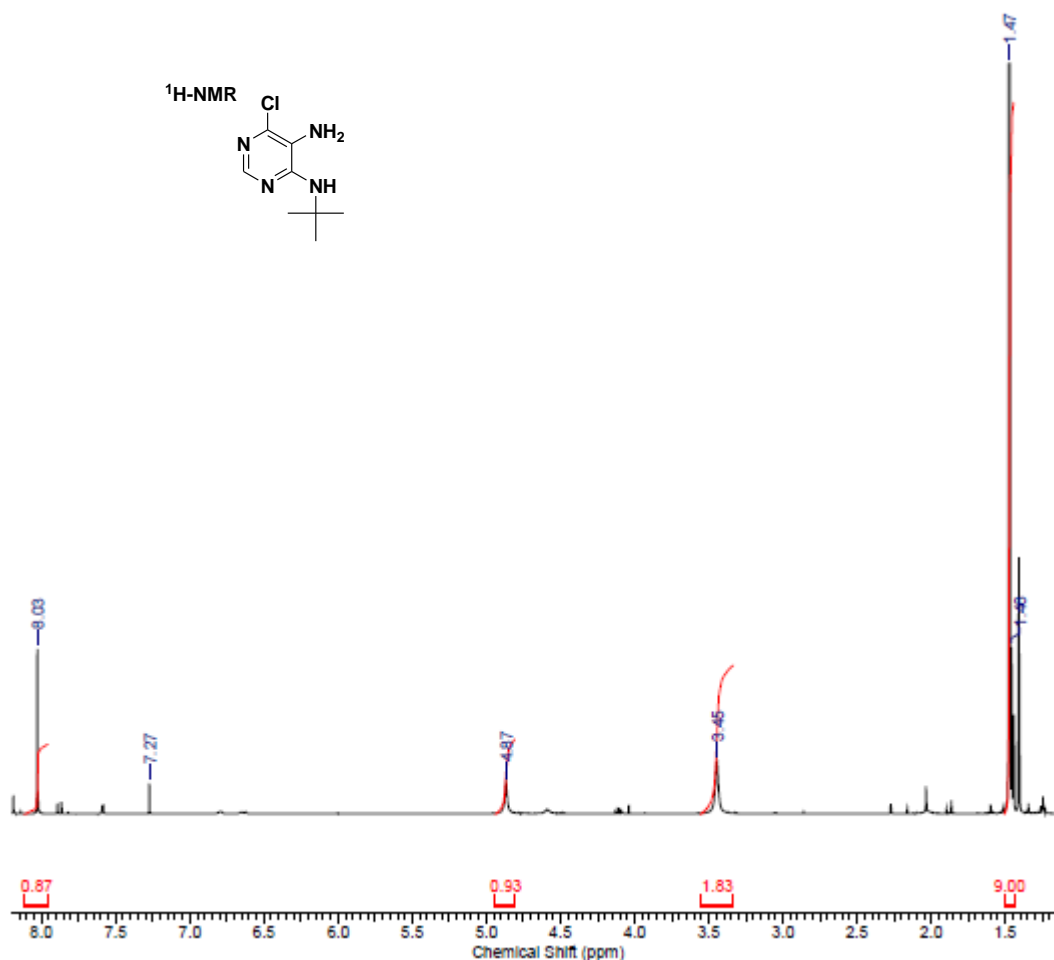

### Elemental Composition Report

#### Single Mass Analysis

Tolerance = 5.0 PPM / DBE: min = -1.5, max = 50.0  
 Element prediction: Off  
 Number of isotope peaks used for i-FIT = 3

Monoisotopic Mass, Even Electron Ions

960 formula(e) evaluated with 3 results within limits (up to 50 closest results for each mass)

Elements Used:

C: 0-17 H: 0-1000 N: 0-10 O: 0-10 Na: 0-1 S: 0-1 Cl: 0-1

PRE-TB-F dilu 9 (0.217)

1: TOF MS ES+

Page 1

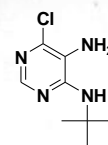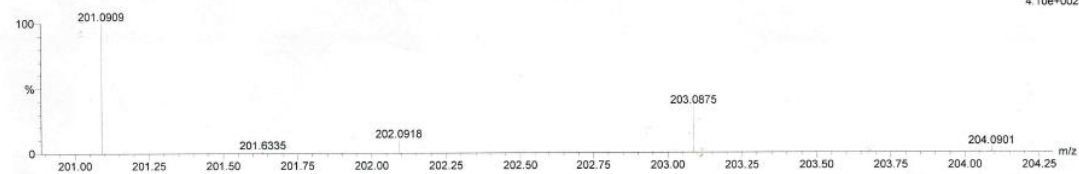

| Mass     | Calc. Mass | mDa  | PPM  | DBE  | i-FIT | Formula        |
|----------|------------|------|------|------|-------|----------------|
| 201.0909 | 201.0907   | 0.2  | 1.0  | 3.5  | 0.6   | C9 H14 N4 Cl   |
|          | 201.0909   | 0.0  | 0.0  | -1.5 | 92.4  | C5 H17 N2 O4 S |
|          | 201.0916   | -0.7 | -3.5 | 7.5  | 72.7  | C13 H13 O2     |



- 5-Amino-4-benzylamino-6-chloropyrimidine (6c):

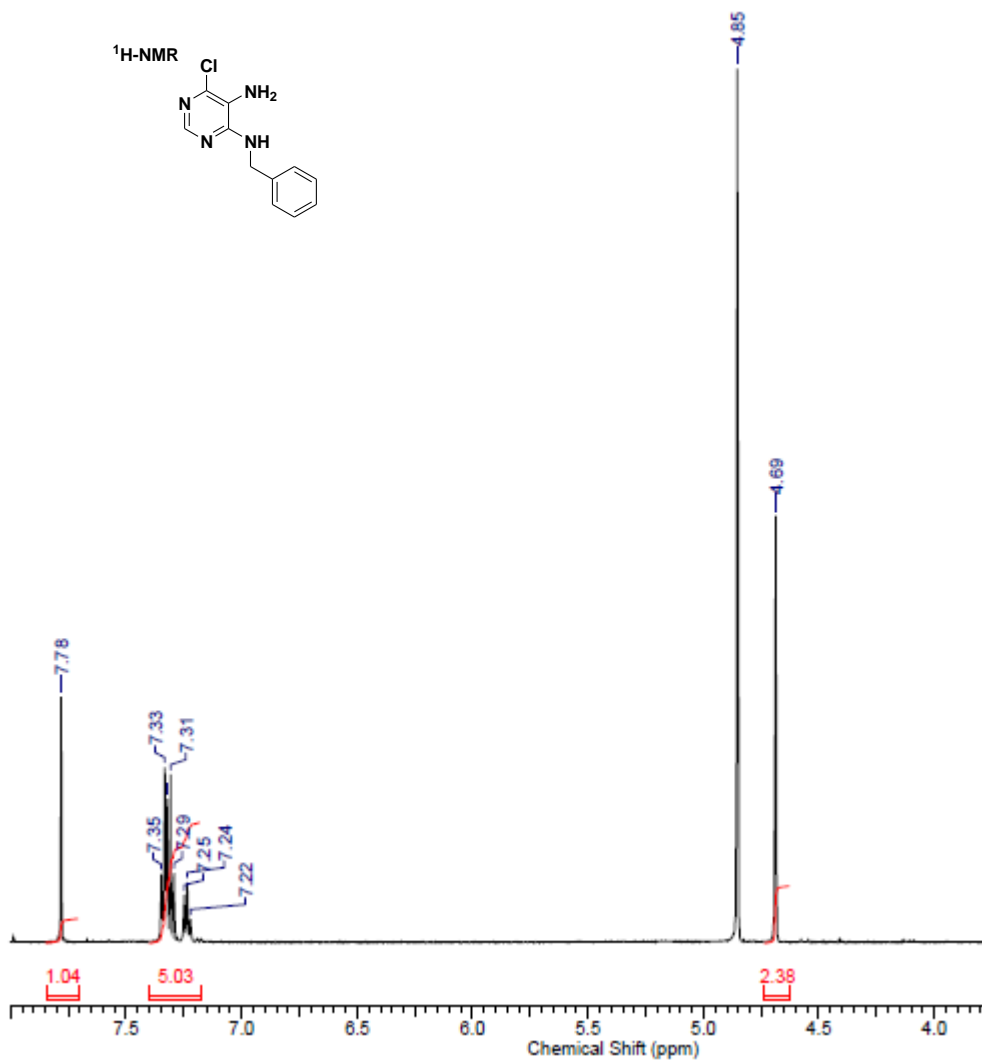

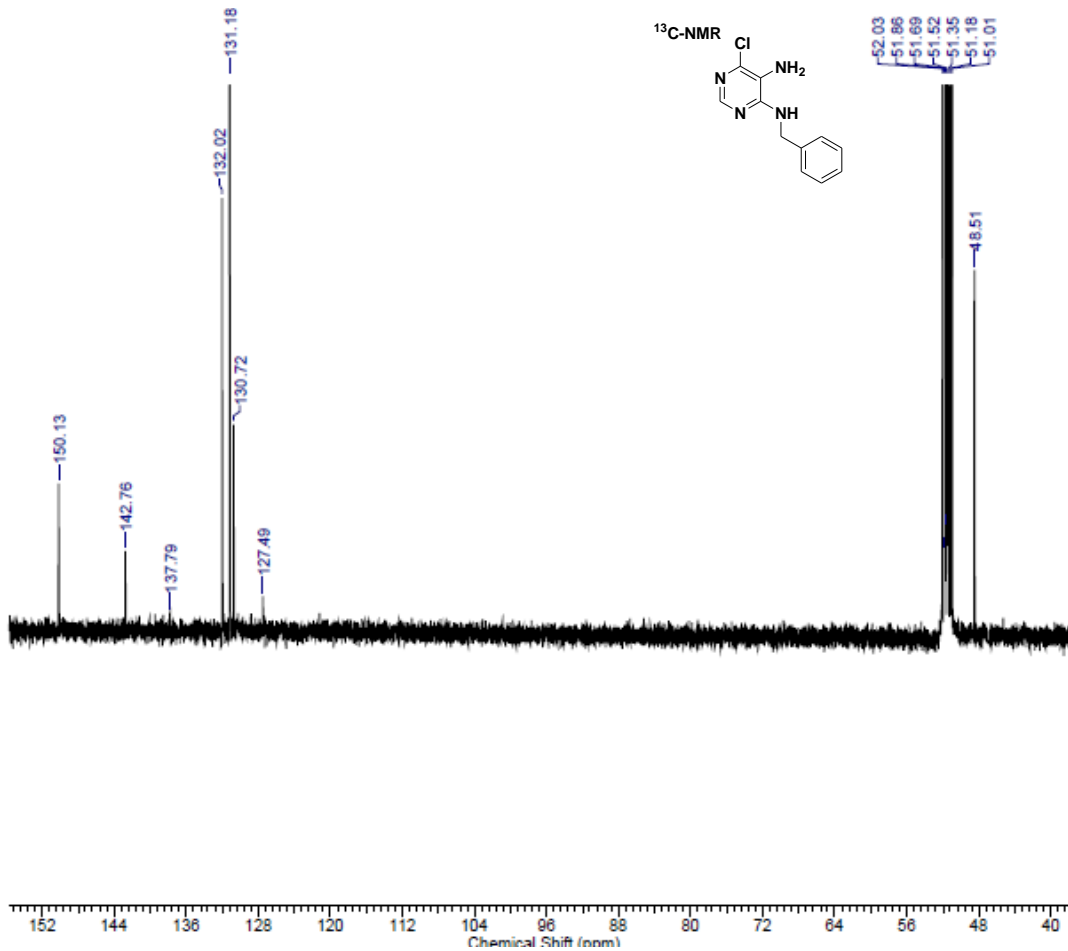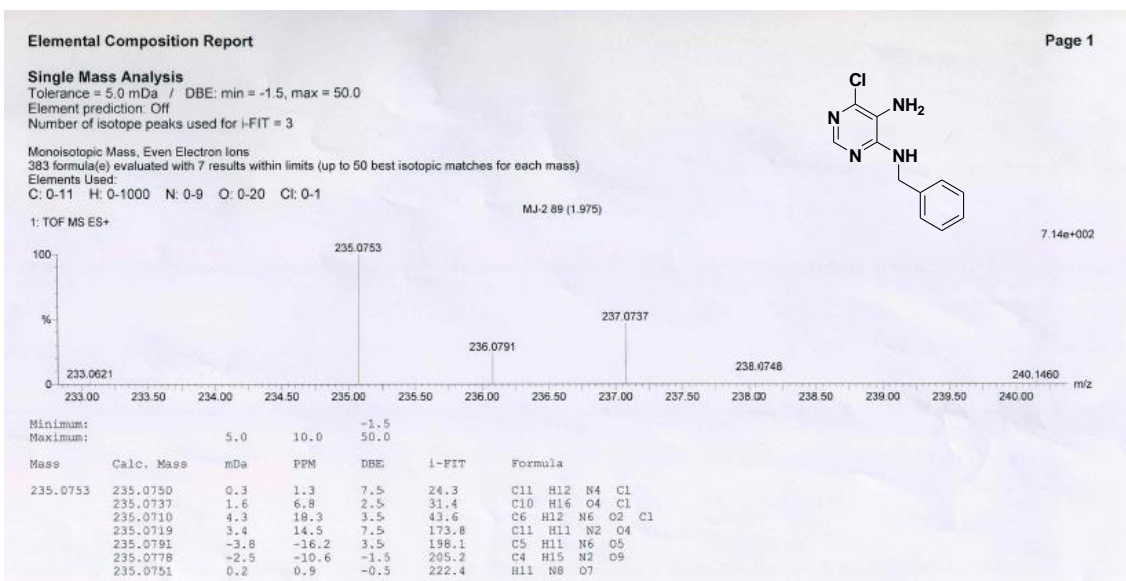

### Elemental Composition Report

#### Single Mass Analysis

Tolerance = 10.0 PPM / DBE: min = -1.5, max = 50.0  
Element prediction: CH  
Number of isotope peaks used for i-FIT = 3

Monoisotopic Mass, Even Electron Ions  
212 formula(e) evaluated with 2 results within limits (up to 50 closest results for each mass)  
Elements Used:  
C: 0-19 H: 0-1000 N: 0-6 O: 0-4 Na: 0-1  
ALM-15 57 (1.252) AM (Top, 1, H: 5000 0.0, 0.0, 1.00)  
1: TOF MS ES+

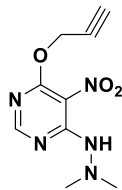

Page 1

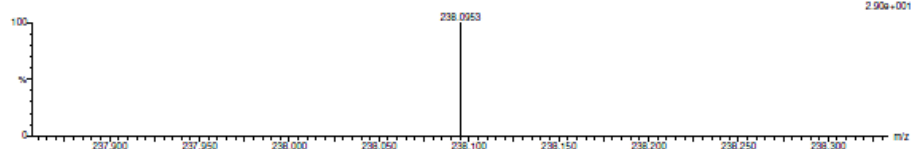

| Mass     | Calc. Mass | mDa  | PPM  | DBE | 1-FIT | 1-FIT (Norm) | Formula         |
|----------|------------|------|------|-----|-------|--------------|-----------------|
| 238.0953 | 238.0940   | 1.3  | 5.5  | 6.5 | 12.7  | 0.5          | C9 H12 N5 O3    |
|          | 238.0956   | -0.3 | -1.3 | 7.5 | 13.1  | 0.9          | C12 H13 N3 O Na |

Ac
